1 **Repression of an activity-dependent autocrine insulin signal is required for sensory**  
2 **neuron development in *C. elegans***

3 Lauren Bayer Horowitz<sup>1</sup>, Julia P. Brandt<sup>1</sup>, and Niels Ringstad<sup>1\*</sup>

4

5 <sup>1</sup>: Skirball Institute of Biomolecular Medicine, Helen L. and Martin S. Kimmel Center for Biology  
6 and Medicine, Department of Cell Biology, Neuroscience Institute, NYU School of Medicine, New  
7 York, NY 10016

8

9 \*correspondence: [Niels.Ringstad@med.nyu.edu](mailto:Niels.Ringstad@med.nyu.edu)

10

11

12

13

14

15

16

17

18

19

20

21

22

23

## 24 **Abstract**

25 Nervous system development is instructed both by genetic programs and activity-dependent  
26 refinement of gene expression and connectivity. How these mechanisms are integrated remains  
27 poorly understood. Here, we report that the regulated release of insulin-like peptides (ILPs)  
28 during development of the *C. elegans* nervous system accomplishes such an integration. We  
29 find that the p38 MAP kinase PMK-3, which is required for the differentiation of chemosensory  
30 BAG neurons, functions by limiting expression of an autocrine ILP signal that represses a  
31 chemosensory-neuron fate. ILPs are released from BAGs in an activity-dependent manner  
32 during embryonic development, and regulate neurodifferentiation through a non-canonical  
33 insulin receptor signaling pathway. The differentiation of a specialized neuron-type is, therefore,  
34 coordinately regulated by a genetic program that controls ILP expression and by neural activity,  
35 which regulates ILP release. Autocrine signals of this kind may have general and conserved  
36 functions as integrators of deterministic genetic programs with activity-dependent mechanisms  
37 during neurodevelopment.

38

## 39 **Introduction**

40 The nervous system comprises many neuron-types, each endowed with a unique  
41 physiology, connectivity and molecular profile. Diversity in neuronal form and function is required  
42 for the assembly of neural circuits that support complex brain functions and behaviors.  
43 Understanding how this diversity is generated during development remains a major question in  
44 neuroscience. A remarkable feature of nervous system development is that genetically encoded  
45 developmental programs cooperate with neural activity dependent processes to promote the  
46 differentiation of specific neuron-types and instruct neuronal connectivity (Wamsley and Fishell

47 2017). How these two different mechanisms - one specified and the other activity-dependent -  
48 are integrated during nervous system development remains poorly understood.

49 The *C. elegans* nervous system displays a wide range of neuronal diversity, and is a  
50 powerful model to study neuronal differentiation (White et al. 1986; Hobert et al. 2016). The  
51 mostly invariant cell lineage that generates the *C. elegans* nervous system (Sulston 1977;  
52 Sulston 1983) suggests that neuronal differentiation in *C. elegans* is principally determined by  
53 genetic programs intrinsic to the cell-lineage. Indeed, many studies have identified transcription  
54 factors that act in specific sub-lineages to promote specific neural fates (Hobert 2016). However,  
55 there are also important roles for neuronal activity during development of the *C. elegans* nervous  
56 system. For example, there is a striking role for activity of embryonic AWC chemosensory  
57 neurons in determining their differentiation into functionally distinct subtypes (Troemel 1999;  
58 Sagasti 2001). More recently, it has been found that there is a critical period during which neural  
59 activity instructs circuit assembly in the *C. elegans* motor system (Barbagallo et al. 2017). Post-  
60 developmentally, neural and sensory activity is required for maintaining the proper morphology  
61 of chemosensory neurons (Peckol 1999; Mukhopadhyay et al. 2008), and for expression of  
62 chemosensory receptors and neuropeptides that define specific chemosensory neuron fates  
63 (Peckol et al. 2001; Gruner et al. 2014; Rojo Romanos et al. 2017). Like the vertebrate nervous  
64 system, therefore, development of the *C. elegans* nervous system requires both lineally  
65 programmed gene regulation and neural activity.

66 We have investigated mechanisms required for the development of a pair of *C. elegans*  
67 sensory neurons - the BAGs, which sense microbe-derived carbon dioxide (CO<sub>2</sub>) to control  
68 foraging behaviors (Brandt and Ringstad 2015). Properly specified BAG neurons are equipped  
69 with a chemotransduction apparatus used to sense CO<sub>2</sub>, which includes the receptor-type

70 guanylyl cyclase GCY-9 (Smith et al. 2013). They also express the neurotransmitter glutamate  
71 (Serrano-Saiz et al. 2013) together with a specific set of neuropeptides e.g. the FMRF-amide  
72 neuropeptides FLP-17, FLP-10 and FLP-19 (Kim and Li 2004). Previous studies identified a  
73 number of transcription factors that promote the BAG neuron fate (Guillermin et al. 2011; Brandt  
74 et al. 2012; Gramstrup Petersen and Pocock 2013; Rojo Romanos et al. 2015). However  
75 mutants for these transcription factors still generate BAG neurons that differentiate to some  
76 extent. Therefore, other mechanisms that promote a BAG fate must exist. Through a screen for  
77 additional regulators of the BAG fate we identified the p38 MAP kinase (MAPK) PMK-3 (Brandt  
78 and Ringstad 2015). PMK-3 is required during development, and post-developmental expression  
79 of PMK-3 does not restore gene expression or function to *pmk-3* mutant BAG cells (Brandt and  
80 Ringstad 2015). The phenotype of *pmk-3* mutants differs from that of transcription factor  
81 mutants; *pmk-3* mutants are strongly defective in BAG-neuron function, but their gene-  
82 expression defects are restricted to a subset of BAG-specific genes. Although it is clear that  
83 PMK-3 functions in BAG development, how PMK-3 promotes differentiation of BAG neurons is  
84 unknown. p38 MAPKs have many functions in the nervous system (Thomas and Huganir 2004),  
85 but these functions are often part of injury- or stress-responses, and roles for p38 MAPKs in  
86 neuronal differentiation remain poorly understood.

87 To determine how PMK-3 functions in BAG neuron development, we isolated and  
88 characterized mutations that suppress the gene expression defects caused by loss of PMK-3.  
89 Here we discover that a major complementation group of suppressor mutations comprises  
90 alleles of *unc-31*, which encodes a factor required for the regulated secretion of neuropeptides  
91 and hormones. Loss of *unc-31* restores gene expression to *pmk-3* mutant BAG cells by  
92 interfering with the regulated release of insulin-like peptides (ILPs), which are overexpressed in

93 *pmk-3* mutants and repress expression of a BAG cell fate. These ILPs are released from BAG  
94 neurons themselves and, therefore, function as an inhibitory autocrine signal during BAG neuron  
95 development. This mechanism combines a gene regulatory program, to set levels of ILP  
96 expression, and neural activity, which controls the release of ILPs during development, to  
97 regulate the differentiation of a specific neuron-type. We propose that similar mechanisms might  
98 function widely during nervous system development to integrate neural activity with genetically  
99 specified developmental programs.

100

## 101 **Results**

102 ***pmk-3* mutant sensory neurons are defective in expression of a functionally important**  
103 **neuropeptide and also have defects in sensory transduction and synapse formation.**

104 *pmk-3* mutants fail to express the BAG-neuron-specific FMRF-amide neuropeptide *flp-17*  
105 (**Figure 1A**). FLP-17 peptides activate the  $G_{i/o}$ -coupled receptor EGL-6 to inhibit motor neurons  
106 in the *C. elegans* egg laying system (Ringstad and Horvitz 2008), and were recently shown to  
107 also be required for BAG-neuron-dependent CO<sub>2</sub> avoidance behavior (Guillermin et al. 2017;  
108 Lee et al. 2017). To determine whether the behavioral defect of *pmk-3* mutants can be explained  
109 by their failure to express *flp-17* neuropeptides, we compared the CO<sub>2</sub> avoidance defects of  
110 *pmk-3* and *flp-17* mutants. Both *pmk-3* and *flp-17* mutants were severely defective for CO<sub>2</sub>  
111 avoidance, although *pmk-3* mutants displayed a more severe defect (**Figure 1B**). Interestingly,  
112 we found that *egl-6* mutants, which lack the known receptor for FLP-17 peptide, were wild-type  
113 for CO<sub>2</sub> avoidance (**Figure 1B**), suggesting that FLP-17 acts on distinct receptors in circuits that  
114 mediate chemotaxis.

115 Because *pmk-3* mutants exhibited a stronger CO<sub>2</sub> avoidance defect than *flp-17* mutants,  
116 we sought to determine whether PMK-3 regulates other aspects of BAG-neuron physiology or  
117 structure. We first tested whether *pmk-3* mutant BAG cells exhibit sensory transduction defects  
118 using *in vivo* calcium imaging to measure their calcium responses to CO<sub>2</sub> stimuli (Brandt et al.  
119 2012). *pmk-3* mutant BAG cells responded to strong CO<sub>2</sub> stimuli, but their responses were  
120 significantly smaller than those of the wild type (**Figure 1C-D, Figure S1**). When wild-type and  
121 *pmk-3* mutant cell responses were scaled to unity, we observed no difference between the  
122 dynamics of the calcium responses, indicating that the kinetics of cell activation was not altered  
123 by *pmk-3* mutation (**Figure S1**).

124 We next tested whether *pmk-3* mutant BAG cells form proper synapses using GFP-  
125 Reconstitution across Synaptic Partners (GRASP) (Feinberg et al. 2008) to label a subset of  
126 BAG synapses. GRASP-puncta were observed throughout the axons of both wild type and  
127 *pmk-3* mutant BAG cells (**Figure 1E**). We observed no significant difference in the number of  
128 puncta in *pmk-3* mutants and in the wild type (**Figure S2**). The average size of puncta in *pmk-3*  
129 mutants, however, was 18% smaller than that of the wild type (**Figure 1F**). From these data we  
130 concluded that the behavioral defects of *pmk-3* mutants that are caused by their failure to  
131 express FLP-17 neuropeptides are likely exacerbated by accompanying defects in BAG neuron  
132 chemotransduction and synapse formation.

133

134 **Genes required for Ca<sup>2+</sup>-dependent neural secretion suppress a neuropeptide gene**  
135 **expression defect of *pmk-3* mutants.**

136 Previously, we found evidence that PMK-3 acts downstream of the Toll-like Receptor  
137 TOL-1 to promote BAG neuron development (Brandt and Ringstad 2015). How PMK-3 itself

138 regulates expression of a BAG neuron fate was unknown. To address this question, we  
139 performed a genetic screen for suppressors of the *flp-17* expression defects of *pmk-3* mutants.  
140 From two screens that covered approximately 25,000 mutagenized haploid genomes, we  
141 recovered 18 mutants in which BAG neuron expression of *flp-17* was restored to *pmk-3* mutants  
142 (**Figure 2A-B**). Five of these mutants defined a major complementation group, and we decided  
143 to further characterize the affected gene. These suppressor mutations strongly restored the  
144 penetrance of *flp-17* reporter expression in *pmk-3* mutant BAG cells (**Figure 2C**), and also  
145 significantly restored the levels of reporter expression (**Figure S3**). We asked whether the  
146 suppressor mutations also affected another PMK-3 regulated gene. Expression of *gcy-33*, which  
147 encodes a guanylyl cyclase required for sensing hypoxia (Zimmer et al. 2009) and is regulated  
148 by PMK-3 in BAG (Brandt and Ringstad 2015), was not restored in suppressed *pmk-3* mutants  
149 (**Figure S4**). Therefore the suppressor gene defined by this complementation group has strong  
150 effects on *flp-17* expression, but does not completely restore the *pmk-3* phenotype to wild-type.

151 Using high-resolution Single Nucleotide Polymorphism (SNP) mapping and whole-  
152 genome sequencing we identified the suppressor gene as *unc-31* (**Figure 2D**), which encodes  
153 the *C. elegans* homolog of Calcium-dependent Activator Protein for Secretion (CAPS).  
154 UNC-31/CAPS is a neuron-specific factor required for docking and priming of dense core  
155 vesicles (DCVs), which mediate the regulated release of neuropeptides, hormones and growth  
156 factors (Speese et al. 2007; Zhou et al. 2007). Because of the known function of *unc-31*, we  
157 hypothesized that  $Ca^{2+}$ -dependent secretion plays a role in BAG neuron development. We  
158 tested whether mutations that affect other critical factors for neural secretion (**Figure 2E**) also  
159 suppress *pmk-3*. Mutation of either UNC-13 or UNC-18, which like UNC-31 are required for  
160 docking and priming of synaptic and dense core vesicles (Richmond 1999; Weimer et al. 2003),

161 strongly restored the frequency of *flp-17* expression to *pmk-3* mutants (**Figure 2F**). We also  
162 tested a partial loss-of-function allele of the syntaxin homolog, UNC-64 (Saifee 1998), and  
163 observed partial restoration of *flp-17* expression to *pmk-3* mutant BAG neurons (**Figure 2F**).

164 Because DCV exocytosis is triggered by elevated  $\text{Ca}^{2+}$  that enters cells through voltage-  
165 gated calcium channels (VGCCs), we next tested whether mutation of VGCC subunits  
166 suppresses the gene expression defect of *pmk-3* mutants. Mutation of the L-type VGCC alpha-1  
167 subunit, *egl-19* (Lee 1997), did not restore *flp-17* expression to *pmk-3* mutants (**Figure 2G**). By  
168 contrast, mutations in the NPQ-type VGCC alpha-1 subunit, *unc-2* (Schafer 1995), did suppress  
169 *pmk-3* and significantly restored *flp-17* expression (**Figure 2G, Figure S5B**). The VGCC alpha-  
170 2-delta subunit UNC-36 is a part of both L- and NPQ-type channels (Lee 1997). Partial loss of  
171 UNC-36 function did not affect the frequency with which *pmk-3* mutants expressed *flp-17* but did  
172 cause an increase in the expression levels of *flp-17* when it was expressed in *pmk-3* mutants  
173 (**Figure S5**). Together, these data show that  $\text{Ca}^{2+}$ -dependent secretion and neural activity  
174 antagonize PMK-3 dependent neuropeptide expression in BAG neurons.

175

176 **Neural activity during development regulates neuropeptide gene expression in BAG**  
177 **neurons.**

178 *pmk-3* functions cell-autonomously and during a critical period of embryonic development  
179 to promote expression of *flp-17* in BAG neurons (Brandt and Ringstad 2015). We tested whether  
180 neural activity and regulated secretion also act cell-autonomously in BAG neurons during the  
181 same critical period. To dampen BAG activity, we used the BAG-neuron-specific and PMK-3-  
182 independent *gcy-9* promoter (Smith et al. 2013; Brandt and Ringstad 2015) to overexpress the  
183 inward rectifying potassium ( $\text{K}^+$ ) channel IRK-1 (Emtage et al. 2012). IRK-1 expression in BAGs



184 restored *flp-17* expression to *pmk-3* mutants (**Figure 3A**). In parallel, we performed BAG-  
185 targeted knockdown of *unc-31* using RNAi. Knock-down of *unc-31* in BAGs alone restored *flp*-  
186 *17* expression to *pmk-3* mutant BAG neurons (**Figure 3B**). We compared the effects of BAG-  
187 targeted IRK-1 expression or *unc-31* knock-down to the effects of disrupting neural activity and  
188 regulated secretion in all neurons using a pan-neuronal promoter. BAG-targeted inhibition of  
189 regulated secretion or neural activity suppressed *pmk-3* as strongly as the corresponding pan-  
190 neuronal manipulations (**Figure 3A,B**). These data strongly suggest that neural activity and  
191 UNC-31 function cell autonomously in BAGs to regulate *flp-17* expression.

192 We next tested when neural activity is required to exert its effect on *flp-17* expression.  
193 We expressed *irk-1* under the control of a heat-shock-inducible promoter in *pmk-3* mutants.  
194 Animals were heat-shocked as embryos, larvae, or adults to transiently induce *irk-1* expression  
195 and reduce neural activity (**Figure 3C**), and were then scored for *flp-17* expression as adults.  
196 The transgene for inducible expression of IRK-1 conferred some suppression in the absence of  
197 heat shock, suggesting that it supports some basal expression of IRK-1 (**Figure 3D**). However,  
198 heat-shock of embryos restored *flp-17* expression to *pmk-3* mutants above this baseline (**Figure**  
199 **3D**). By contrast, induction of IRK-1 expression during larval or adult stages did not significantly  
200 modify the *pmk-3* gene expression defect (**Figure 3D**). Together, these data indicate that, like  
201 PMK-3, neural activity and UNC-31 are required during development in BAG neurons to regulate  
202 neuropeptide gene expression.

203

#### 204 ***pmk-3* mutation dysregulates expression of insulin-like genes in BAG neurons.**

205 Why might mutations in *unc-31* and other genes required for regulated secretion of  
206 peptides suppress the effects of *pmk-3* mutation? We hypothesized that in *pmk-3* mutants a

207 factor, possibly a peptide hormone, is secreted by BAGs in an UNC-31-dependent manner and  
208 inhibits their development. We sought evidence for such a secreted factor by transcriptionally  
209 profiling embryonic BAG neurons from the wild type and *pmk-3* mutants. We used fluorescence-  
210 activated cell-sorting to purify GFP-marked BAG neurons and 'non-BAG' non-fluorescent cells.  
211 Differential gene expression analysis identified 692 transcripts whose expression significantly  
212 differed between wild-type and *pmk-3* mutant BAG cells ( $P < 0.05$ ) (**Figure 4A**). 189 of these  
213 transcripts were also BAG-enriched, as determined by a comparison of wild-type BAG neurons  
214 vs non-BAG cells ( $P < 0.05$ ). Principal component analysis revealed that wild-type and *pmk-3*  
215 mutant BAG cell transcriptomes are highly separable (**Figure 4B**), indicating that *pmk-3* is  
216 required for proper expression of many genes in developing BAG neurons.

217 Inspection of genes affected by *pmk-3* mutation revealed that *pmk-3* mutant BAG cells  
218 over-express multiple insulin-like peptides (ILPs) (**Figure 4C**). The ILP gene *daf-28*, which is  
219 enriched in wild-type BAG neurons compared to non-BAG cells (**Figure S6**), is upregulated in  
220 *pmk-3* mutant BAGs (**Figure 4D**). *ins-14*, *ins-29* and *ins-30*, which are not normally expressed  
221 in wild-type BAGs, are clearly expressed in *pmk-3* mutant BAG neurons (**Figure 4E-G**). The  
222 ILPs affected by *pmk-3* mutation all encode ILPs that are agonists of the *C. elegans* insulin/IGF-  
223 like receptor (InR) DAF-2 (Kenyon 1993; Kimura 1997; Murphy and Hu 2013). Our RNA-Seq  
224 data also revealed that an ILP gene that encodes an InR antagonist - *ins-1* (Cornils et al. 2011)  
225 - is enriched in wild-type BAG neurons (**Figure S6**), but its expression is not affected by *pmk-3*  
226 mutation (**Figure 4C**). These data suggested that defects caused by loss of PMK-3 might result  
227 from excess expression of some ILPs expressed in embryonic BAGs. To test this hypothesis,  
228 we next sought to determine how ILP production by BAGs regulates BAG neuron development.  
229

230 **An autocrine insulin signaling pathway antagonizes PMK-3 dependent gene expression**  
231 **in BAG cells.**

232 To disrupt ILP production we used the dominant negative *daf-28(sa191)* allele (**Figure**  
233 **5A**). *daf-28(sa191)* generates a non-functional ILP that mis-folds and disrupts production of  
234 other ILPs (Li et al. 2003). *daf-28(sa191)* phenocopied mutations that affect regulated secretion  
235 and restored *flp-17* expression to *pmk-3* mutants (**Figure 5B**). A deletion allele of *daf-28* (**Figure**  
236 **5A**) also partially restored *flp-17* expression to *pmk-3* (**Figure 5C**), indicating that although BAGs  
237 produce several ILPS, DAF-28 has a non-redundant function in regulating BAG gene  
238 expression. We next overexpressed DAF-28(sa191) specifically in *pmk-3* mutant BAG neurons  
239 to test whether ILP production in BAG neurons themselves is required for their development.  
240 Overexpressing DAF-28(sa191) in BAGs strongly restored *flp-17* expression (**Figure 5B**).  
241 Together, these data indicate that ILP expression by BAGs antagonizes PMK-3-dependent  
242 expression of *flp-17*. Because *pmk-3* mutant BAGs overexpress ILPs, these data further suggest  
243 that the BAG neuron defects of *pmk-3* mutants are at least partly caused by dysregulated  
244 expression and release of ILPs.

245 ILPs released from BAGs might act on other cells that in turn release factors that regulate  
246 gene expression in BAGs. Alternatively, ILPs released from BAGs might function as autocrine  
247 signals and activate insulin-receptor signaling pathways in BAG themselves. To resolve these  
248 possibilities, we sought to determine the site of action of the InR signaling pathway that regulates  
249 *flp-17* expression in BAG neurons. First, we interrogated genes known to function in InR  
250 signaling for suppression of *pmk-3*. The InR DAF-2 signals via the phosphoinositide-3 (PI-3)  
251 kinase, AGE-1 (Morris 1996), and two serine/threonine kinases, AKT-1 and AKT-2 (Paradis  
252 1998) (**Figure 5D**). Many genes that function in the canonical InR signaling pathway mutate to

253 suppress *pmk-3*; loss-of-function mutations in *daf-2*, *age-1*, and *akt-1*, each strongly restored  
254 *flp-17* expression to *pmk-3* mutants (**Figure 5E**). We observed no effect, however, of *akt-2*  
255 mutation on the *pmk-3* phenotype (**Figure 5E**). We next determined where the DAF-2 InR was  
256 required for its role in the BAG neurons development. We tested the hypothesis that ILPs are  
257 part of an autocrine signal, and performed BAG neuron-targeted knockdown of *daf-2* using RNAi.  
258 Like the *daf-2* chromosomal mutation, BAG-targeted *daf-2* RNAi strongly restored *flp-17*  
259 expression to *pmk-3* mutant BAG cells (**Figure 5F**). Together with our analysis of ILP expression  
260 in BAGs, these data indicate that an autocrine ILP signal represses *flp-17* expression in BAG  
261 neurons.

262

### 263 ***pmk-3* mutant BAG cells experience increased insulin signaling.**

264 InR-dependent phosphorylation inhibits entry of the Forkhead (FOXO) transcription factor  
265 DAF-16 into the nucleus to regulate transcription (Lee 2001; Lin 2001). We used this  
266 phenomenon to independently test the hypothesis that *pmk-3* mutation causes BAG neurons to  
267 experience increased autocrine ILP signaling. We generated transgenic animals that express a  
268 DAF-16::GFP fusion in BAG neurons, and we measured the ratio of nuclear DAF-16 to  
269 cytoplasmic DAF-16 as an index of InR signaling in BAGs. This ratio varied among wild-type  
270 BAG neurons, some of which showed little nuclear DAF-16::GFP fluorescence and others with  
271 nuclear fluorescence that was comparable to that in the cytoplasm (**Figure 6A, left, middle**).  
272 While *pmk-3* mutant BAG neurons also displayed a range of nuclear-to-cytoplasmic DAF-  
273 16::GFP ratios, their distribution was significantly shifted towards lower ratios compared to those  
274 measured in the wild type (**Figure 6B**), and on average had more cytoplasmic DAF-16::GFP. As  
275 expected, mutation of the InR DAF-2 caused a dramatic accumulation of DAF-16::GFP in the

276 nuclei of BAG neurons (**Figure 6A, right**), but in *daf-2* mutants there was no significant effect of  
277 *pmk-3* mutation on the ratios of nuclear to cytoplasmic DAF-16::GFP (**Figure 6C**). These data  
278 indicate that *pmk-3* mutant BAG neurons experience elevated insulin signaling, and provide  
279 independent corroboration of a model in which PMK-3 negatively regulates ILP expression and  
280 InR signaling.

281

282 **InR/DAF-2 regulates neuropeptide expression independent of FOXO/DAF-16 in BAG**  
283 **chemosensory neurons.**

284 We next tested whether the DAF-16/FOXO transcription factor, which is a canonical  
285 effector of InR signaling, is required for ILPs to regulate *flp-17* expression. Because the *daf-16*  
286 locus is tightly linked to the *flp-17* reporter that we use to assay the *pmk-3* mutant phenotype,  
287 we used CRISPR/Cas9 to generate a new *daf-16* deletion allele in a strain carrying the *flp-17*  
288 reporter (**Figure S7**). We did not observe an effect of *daf-16* mutation on the frequency of  
289 animals that express *flp-17*, but we did note that these mutants express *flp-17* at lower levels  
290 compared to the wild-type (**Figure S7**). Notably, knock-down of *daf-2* by RNAi still restored  
291 expression of *flp-17* to *pmk-3* mutant BAG cells in the absence of *daf-16* (**Figure 5F**), indicating  
292 that DAF-2 regulates *flp-17* expression in the absence of DAF-16. Mutating another transcription  
293 factor that functions in the DAF-2 signaling pathway – the Nrf-like transcription factor SKN-1  
294 (Tullet et al. 2008) – did not affect the penetrance or levels of *flp-17* expression (**Figure S7**).  
295 Together, these data indicate that DAF-2 regulates gene expression in BAG neurons through a  
296 mechanism independent from its canonical effector DAF-16. Although we could not rule out a  
297 role for SKN-1 in this pathway, the absence of any effect of *skn-1* mutation on *flp-17* expression  
298 suggests that this factor does not function in BAG neuron development.

299

300 **Attenuating autocrine insulin signaling restores function to *pmk-3* mutant BAG neurons.**

301 Mutation of PMK-3 dysregulates expression of ILP genes in BAG neurons, but also affects  
302 expression of many other genes (**Figure 4A**). To what extent is BAG neuron function affected  
303 by increased production of ILPs? To address this question we tested whether disrupting  
304 autocrine insulin signaling in BAGs restores CO<sub>2</sub> avoidance behavior to *pmk-3* mutants, which  
305 overexpress ILPs. We again used the dominant negative DAF-28(sa191) variant to disrupt  
306 insulin production in BAG neurons of *pmk-3* mutants, this time testing for effects of knocking  
307 down ILP production on behavior. We found that the chromosomal *daf-28(sa191)* mutation  
308 significantly restored CO<sub>2</sub> avoidance behavior to *pmk-3* mutants (**Figure 7A**). Overexpressing  
309 DAF-28(sa191) in *pmk-3* mutant BAG cells also suppressed the CO<sub>2</sub> avoidance defect of *pmk-*  
310 *3* mutants (**Figure 7B**), indicating that ILP production by BAGs is required for the effects of *pmk-*  
311 *3* mutation on behavior. Next, we asked whether disrupting *daf-2* function in BAGs could also  
312 restore behavior to *pmk-3* mutants. BAG-neuron-specific *daf-2* RNAi did not affect CO<sub>2</sub>  
313 avoidance by wild-type worms (**Figure 7C**), but significantly restored CO<sub>2</sub> avoidance to *pmk-3*  
314 mutants (**Figure 7C**). Together these data show that the functional defects caused by loss of  
315 PMK-3, which are associated with widespread changes in gene regulation, can be rescued by  
316 targeting the ILP signaling pathway in BAG neurons.

317

318 **Discussion**

319 We have found that the p38 MAP kinase PMK-3 controls development of *C. elegans*  
320 chemosensory BAG neurons through an unexpected mechanism: the regulation of an activity-  
321 dependent autocrine insulin signal (**Figure 7D**). This insulin signal is regulated at the level of

322 gene transcription. *pmk-3* mutant sensory neurons overexpress transcripts encoding insulin-like  
323 peptides (ILPs). As a consequence, their BAG cells experience elevated DAF-2/Insulin Receptor  
324 (InR) signaling, which antagonizes expression of a neuropeptide gene essential for their  
325 function. We further show that the neuronal defects caused by loss of PMK-3 and concomitant  
326 increases in ILP production are abolished in mutants with defects in activity-dependent neuronal  
327 secretion. The autocrine insulin signal that controls expression of a chemosensory neuronal fate  
328 is, therefore, controlled both by a cell-intrinsic PMK-3-dependent genetic mechanism and by  
329 neural activity, which controls secretion of ILPs. This mechanism neatly integrates neural activity  
330 with a developmental program of gene expression to regulate a neuronal cell fate.

331 Remarkably, although ILP genes represent only a fraction of the genes that are  
332 dysregulated by loss of PMK-3 we found that it is possible to restore BAG-neuron function to  
333 *pmk-3* mutants by only manipulating insulin signaling in BAG cells. Because of the central role  
334 for ILP signaling in the etiology of the *pmk-3* mutant phenotype and because this mechanism  
335 converges on regulation of genes with defined roles in neuron-function, it will be of great interest  
336 to understand molecular mechanisms by which PMK-3 regulates ILP expression and how DAF-  
337 2/InR signaling regulates expression of FLP-17 neuropeptides.

338

### 339 **Activity-dependent autocrine growth-factor signaling in the nervous system**

340 A key feature of ILP signaling in BAG neuron development is that BAG neurons  
341 themselves supply the ILPs that regulate their differentiation. Recently, a number of studies have  
342 revealed the functional importance of activity-dependent autocrine signals in circuit development  
343 (reviewed in (Herrmann and Broihier 2018)). In mammalian hippocampus, an activity-dependent  
344 autocrine Insulin-like Growth Factor 2 (IGF2) signal stabilizes synapses made by dentate

345 granule cells onto their postsynaptic partners (Terauchi et al. 2016), and in visual cortex a subset  
346 of interneurons generates an activity-dependent autocrine IGF1 signal that regulates the  
347 strength of their inhibitory synaptic inputs (Mardinly et al. 2016). Non-insulin like growth factors  
348 also function as autocrine signals during nervous system development. Brain-Derived  
349 Neurotrophic Factor (BDNF) and Bone Morphogenic Protein (BMP) - like factor homolog have  
350 been identified as autocrine signals that regulate synapse development and function in  
351 mammalian hippocampus and at the insect neuromuscular junction, respectively (James et al.  
352 2014; Harward et al. 2016).

353         Because these autocrine signals are released in an activity-dependent manner, they are  
354 able to trigger a mechanism that translates neuronal activity into intracellular signals to regulate  
355 gene expression. There are well studied mechanisms that couple neural activity to gene  
356 expression via intracellular calcium signaling *e.g.* CREB signaling (West and Greenberg 2011).  
357 Gene regulation by autocrine activity-regulated growth factor signals might, however, differ in  
358 functionally important ways. An autocrine signal might have a different threshold for activation  
359 by neural activity than CREB-dependent mechanisms, allowing for different patterns of neural  
360 activity to engage different gene regulatory mechanisms. Once engaged, autocrine signals might  
361 act on different timescales, and they likely regulate gene targets distinct from those regulated by  
362 CREB. Interestingly, some aspects of BAG neuron development are regulated by CREB (Rojo  
363 Romanos et al. 2017). Neural activity, therefore, controls the development of BAG neurons  
364 through multiple mechanisms, and these cells will be excellent models for studying the distinct  
365 roles in nervous system development of CREB-based excitation-transcription coupling and gene  
366 regulation by activity-regulated autocrine signals.

367



368 **Insulin signaling and nervous system development.**

369           During development of *C. elegans* BAG neurons, ILPs inhibit expression of a fully  
370 differentiated and functional BAG neuron fate. This role for ILPs differs from their established  
371 function as regulators of cell proliferation during nervous system development in both insects  
372 and mammals (Fernandez and Torres-Aleman 2012). During development of the *Drosophila*  
373 nervous system, ILPs are produced by glial cells in response to nutritive cues, and trigger  
374 adjacent neural stem cells to exit quiescence and begin dividing (Chell and Brand 2010; Sousa-  
375 Nunes et al. 2011). In mammals insulin-like signaling factors promote neural stem cell  
376 proliferation; changing IGF1 levels in the developing rodent brain correspondingly alters brain  
377 size (D'Ercole et al. 1996). Mammalian IGF-1 has been shown to function as a mitogenic signal  
378 during corticogenesis, and recruits neural progenitors to the cell-cycle (Mairet-Coello et al.  
379 2009). A related factor - IGF2 - promotes the maintenance and expansion of neural stem cells  
380 in mammals (Ziegler et al. 2014), and also regulates the proliferation of cerebral cortical  
381 progenitors (Lehtinen et al. 2011). We observed a role for ILPs in nervous system development  
382 that is distinct from their known function as regulators of proliferation, and found that ILPs repress  
383 the differentiation of a specific neuron-type. Both functions of ILPs in nervous system  
384 development have in common, however, that they delay the appearance of fully differentiated  
385 and functional neurons – either by promoting proliferation of neuronal stem cells at the expense  
386 of their differentiation, or by inhibiting expression of specific neuronal cell fates.

387           *C. elegans* express a large number of ILPs, many in the nervous system. Insulin-like  
388 receptor and its associated signaling factors are also expressed throughout the *C. elegans*  
389 nervous system, as is PMK-3, which we show regulates ILP gene expression. It is, therefore,  
390 likely that the ILP-dependent mechanism that we have found in developing chemosensory

391 neurons, also functions to regulate the differentiation of other neuron-types in *C. elegans*.  
392 Furthermore, the molecular constituents of ILP signaling pathways are conserved between  
393 nematodes and vertebrates. We suggest, therefore, that autocrine ILP signals might play similar  
394 roles in the regulation of neuronal cell fates during development of the vertebrate nervous  
395 system.

396

## 397 **Materials and Methods**

### 398 Strains

399 All strains used in this study were cultivated under standard conditions (Brenner 1974) at 20°C,  
400 and are listed in **Supplementary File 1**. The *daf-16(wz151)* deletion strain was generated by  
401 CRISPR/Cas9-mediated mutagenesis using Cas9 ribonucleoprotein (Paix 2015), along with a  
402 co-CRISPR strategy to increase efficiency (Kim et al. 2014), as previously described (Zamanian  
403 et al. 2018). Transgenic animals were generated via microinjection as previously described  
404 (Mello 1991).

405

### 406 Plasmids

407 Plasmids used in this study were made using Gibson assembly (Gibson et al. 2009) and are  
408 listed in **Supplementary File 2**. The *daf-28(sa191)* cDNA was purchased as a gene block from  
409 Integrated DNA Technologies and cloned into the pPD49.26 fire vector using Gibson cloning.

410

### 411 Microscopy

412 Animals were mounted on 2% agarose pads made in M9 medium and immobilized with 30 mM  
413 sodium azide (NaN<sub>3</sub>). Fluorescence and differential interference contrast (DIC) micrographs

414 were acquired with a Zeiss Axioimager M2 upright microscope equipped with an EM-CCD  
415 camera (Andor) using a 100x objective (1.4 N.A.). Z-stacks were obtained with an LSM700 laser-  
416 scanning confocal microscope (Zeiss) using a 40x objective (1.4 N.A.). Maximum projections of  
417 image stacks were generated with Fiji (Schindelin et al. 2012).

418

#### 419 CO<sub>2</sub> avoidance assays

420 CO<sub>2</sub> avoidance assays were performed as previously described (Brandt and Ringstad 2015).  
421 Briefly, a total of 40-50 adult hermaphrodites were confined to a custom-made chamber on an  
422 unseeded 10-cm NGM plate fitted with inlets of air and 10% CO<sub>2</sub>. Gas mixes were pushed into  
423 the chamber at 1.5 mL/min using a syringe pump (New Era, Inc.). After 35 minutes, an avoidance  
424 index (A.I.) was computed according to the following equation:  $A.I. = \frac{N_{air} - N_{CO_2}}{\text{total number of animals}}$ .

425

#### 426 in vivo calcium imaging

427 *In vivo* calcium imaging was performed as previously described (Smith et al. 2013; Brandt and  
428 Ringstad 2015) using the ratiometric calcium indicator YC3.60 (Nagai et al. 2004).

429

#### 430 Quantification of GRASP puncta

431 The number and size of GRASP puncta were quantified using Fiji (Schindelin et al. 2012). Z-  
432 stacks of the BAG synaptic zone were thresholded and subjected to particle analysis, which  
433 automatically drew Region of Interests (ROIs) around puncta whose fluorescence intensity was  
434 above background. The number of puncta was defined as the number of particles found in the  
435 synaptic zone, and the area of each particle was measured to determine the size of the GRASP  
436 puncta. Each particle was manually inspected to confirm that it contained one GRASP puncta;

437 if a particle encompassed multiple puncta - separate ROIs were manually drawn around the  
438 individual puncta.

439

440 *Genetic suppressor screen for regulators of p38 MAPK-dependent BAG cell development*

441 *pmk-3* mutant animals carrying the BAG fate marker *ynIs64[P<sub>flp-17</sub>::GFP]* were mutagenized with  
442 47 mM ethyl methane sulfate (EMS) as described (Brenner 1974), and screened in the F2  
443 generation for restored GFP expression on a Leica M165 FC fluorescence dissecting  
444 microscope. Approximately 10% of *pmk-3* mutants express *P<sub>flp-17</sub>::GFP*, therefore mutants were  
445 identified as candidate suppressors of *pmk-3* if more than 50% of their F3 progeny had restored  
446 GFP expression.

447

448 *Mapping and cloning of suppressor alleles*

449 Initial round of screening identified two non-complementing alleles, *wz75* and *wz76*. High-  
450 resolution-SNP-mapping of *wz75* was performed by crossing *wz75* mutants to the polymorphic  
451 strain CB4856 and identifying crossovers using restriction fragment polymorphisms (snip-SNPs)  
452 (Davis et al. 2005), which placed *wz75* in a 5 Mbp interval on LG IV. Whole-genome sequencing  
453 revealed that *wz75* and *wz76* mutants carry mutations in *unc-31*: *wz75* contains a G → A  
454 mutation predicted to change Trp971 to an Amber stop, and *wz76* contains a G → A mutation  
455 predicted to disrupt a splice-donor/acceptor site. Further screening and complementation tests  
456 identified 3 additional alleles of *unc-31*: *wz112*, *wz127*, and *wz130*. Whole genome sequencing  
457 of *wz112* and *wz130* revealed that *wz112* is a G → A missense mutation predicted to change  
458 Asp422 to Asn, and *wz130* is a G → A nonsense mutation predicted to change Trp1114 to an

459 Opal stop. Sanger sequencing of *wz127* showed that it is a C → T mutation predicted to change  
460 Gln15 to an Amber stop.

461

#### 462 Transgene Expression Analysis

463 Animals were immobilized as described above. Reporter transgene expression was quantified  
464 using the 20x (.8 NA) objective on a Zeiss Axioimager M2 upright microscope equipped with an  
465 EM-CCD camera (Andor). To determine the penetrance of transgene expression, we measured  
466 the number of BAG cells expressing the reporter in each animal. As an alternative method, we  
467 counted the percentage of animals expressing the reporter on a Leica M165 FC fluorescence  
468 dissecting microscope. To determine the levels of reporter transgene expression, we measured  
469 the mean pixel values in a 30 or 50-pixel-radius circular ROI centered on the BAG soma using  
470 Fiji (Schindelin et al. 2012). For all experiments, data was collected over three days.

471

#### 472 Heat shock experiments

473 *pmk-3(ok169)* mutant animals carrying a *P<sub>hsp16.41</sub>::irk-1* transgene were shifted twice to 37°C for  
474 a half hour, with a one hour recovery at 20°C in between. After heat shock, animals resumed  
475 growth at 20°C. Heat-shocked embryos and larvae were assayed for gene expression when they  
476 reached adulthood, while adults were assayed 24 hours after heat shock.

477

#### 478 Cell culture and FACS Sorting for RNA-Seq

479 Embryonic cell cultures were prepared from wild-type and *pmk-3(wz31)* mutant animals  
480 expressing the BAG-specific and *pmk-3* independent marker *wz1s113[P<sub>gcy-9</sub>::GFP]*, as previously  
481 described (Christensen 2002; Zhang 2002). In brief, embryos were isolated from synchronized

482 populations of hypochlorite treated hermaphrodites, and dissociated into single cells by chitinase  
483 treatment. Cells were resuspended in L-15 medium supplemented with 10% FBS (Sigma) and  
484 antibiotics, and passed through a 5  $\mu\text{m}$  syringe filter (Millipore). Cells were plated onto poly-D-  
485 lysine coated single-well chambered cover glasses (Lab-Tek II) and incubated overnight at 25°C.

486 GFP-labeled BAG neurons were isolated approximately 24 hours after dissociation using  
487 Fluorescence Activated Cell Sorting (FACS); sorted cells were confirmed to be >90% GFP  
488 positive by direct inspection on a fluorescent microscope. Non-fluorescent, 'non-BAG', cells were  
489 also collected. Dead cells were marked with propidium-iodide and excluded from sorted cells.  
490 Sorting was performed on a FACSAria IIu SORP cell sorter using a 70  $\mu\text{m}$  nozzle. Cells were  
491 sorted directly into RNA Extraction Buffer (10,000 cells/100  $\mu\text{L}$  buffer), and RNA was purified  
492 using the Arcturus PicoPure RNA Isolation Kit (Thermo Fisher). RNA integrity and concentration  
493 were evaluated using an Agilent Bioanalyzer. RNA samples had an RNA Integrity score of at  
494 least 8, indicating that all samples were of high quality. Two biological replicates were prepared  
495 from each cell type.

#### 496

#### 497 RNA-Seq Analysis of wild type and *pmk-3* mutant BAG neurons

498 cDNA libraries were prepared from RNA (1-2 ng) using the Ovation RNA-Seq System V2  
499 (NuGEN), multiplexed, and sequenced as 100 base pair paired end reads using the HiSeq 2500  
500 (Illumina). Reads were aligned to the *Caenorhabditis elegans* genome and transcriptome  
501 (Wormbase WS243) using the STAR software package (Dobin et al. 2013). Gene expression  
502 quantification was performed using HTSeq (Anders 2014). Differential expression analysis was  
503 done using the DeSeq2 package (Love et al. 2014) in R. Heatmaps were generated using gplots  
504 (Warnes 2016) and RColorBrewer (Neuwirth 2014) R software packages. Read coverage

505 histograms were generated from genomic alignments (BAM files) using Integrative Genomics  
506 Viewer (Thorvaldsdottir et al. 2013).

507

### 508 DAF-16::GFP Localization

509 Z-stacks were collected from animals expressing  $P_{BAG}::daf-16::GFP$  as described above, and  
510 image analysis was performed in Fiji (Schindelin et al. 2012). For each cell, the maximum sum  
511 projection of 5 stacks ( $\sim 1 \mu\text{m}/\text{stack}$ ) was generated. ROIs were drawn around the nucleus and  
512 cell body in a summated projection image, and the total amount of DAF-16::GFP fluorescence  
513 was measured in each region. The amount of fluorescence in the cytoplasm was defined as the  
514 total amount of DAF-16::GFP fluorescence in the cell body minus the amount in the nucleus. We  
515 then computed the ratio of nuclear DAF-16::GFP fluorescence to cytoplasmic DAF-16::GFP  
516 fluorescence to monitor insulin activity.

517

### 518 Statistical Analysis

519 Standard error of the mean (SEM) and  $P$ -values for statistical analyses were calculated using  
520 GraphPad Prism Software.

521

### 522 **Acknowledgments**

523 This work was supported by the National Institute of Health (R35 GM122573 to N.R. and F31  
524 NS100360 to L.B.H.). We thank Oliver Hobert (Columbia University) and Jane E. Hubbard (NYU  
525 School of Medicine) for reagents, Farzana Khan and Eugene Rudensky for isolating *unc-31*  
526 alleles from suppressor screens, Nechama Schneider for assisting with measurements of *flp-17*  
527 expression levels, and Igor Dolgalev for assisting with bioinformatic analysis. Flow cytometry

528 assisted cell sorting was performed by the Cytometry and Cell Sorting Laboratory at NYU School  
529 of Medicine. Whole-genome sequencing and differential gene expression analysis was  
530 performed by the NYU School of Medicine Genome Technology Center. Some strains were  
531 provided by the CGC, which is funded by the NIH Office of Research Infrastructure Programs  
532 grant P40 OD010440, and the Mitani lab (Tokyo Women's Medical University, Japan).

533

### 534 **Author Contributions**

535 L.B.H. and N.R. designed and performed experiments, interpreted data, and wrote the  
536 manuscript. J.P.B. performed genetic suppressor screens and mapping experiments.

537

### 538 **Competing Interests**

539 The authors declare no competing interests.

540

### 541 **Figure Legends**

542

543 **Figure 1: PMK-3 mutation affects neuropeptide expression, chemotransduction and**  
544 **synapse morphology in chemosensory BAG neurons.**

545 A. Overlaid differential interference contrast (DIC) and fluorescence micrographs of wild-type  
546 and *pmk-3(wz31)* mutant animals expressing *P<sub>flp-17</sub>::GFP*, a marker of differentiated BAG cells.

547 B. CO<sub>2</sub>-avoidance indices of the wild type, *pmk-3(ok169)*, *flp-17(n4894)*, and *egl-6(n4536)*

548 mutants. N ≥ 5 independent trials. *P* < 0.0001 for wild type vs. *pmk-3*, and *P* = 0.0007 for

549 wild-type vs. *flp-17*, ordinary one-way ANOVA followed by Tukey's multiple comparisons test.

550 Error bars represent SEM.



551 C. Average calcium responses of wild-type and *pmk-3(ok169)* mutant BAG cells to 10% CO<sub>2</sub>  
552 stimuli. Shaded area represents the mean  $\pm$  SEM. N > 26 animals/genotype. (R/R<sub>0</sub>) is the ratio  
553 of YFP/CFP emissions normalized to the pre-stimulus ratio.

554 D. Cumulative probability plots of the peak calcium responses (R/R<sub>0</sub>) in wild-type and  
555 *pmk-3(ok169)* mutant BAG cells to CO<sub>2</sub> stimuli. *P* = 0.0038, unpaired t-test.

556 E. Fluorescence micrographs of BAG GRASP puncta in wild-type and *pmk-3(ok169)* mutant  
557 BAG cells using *P<sub>gcy-9::nlg-1::GFP<sub>1-10</sub></sub>* *P<sub>odr-2b::nlg-1::GFP<sub>11</sub></sub>*, overlaid with *P<sub>gcy-9::dsRed</sub>* to label  
558 BAG cells.

559 F. Quantification of the size of GRASP puncta in wild-type and *pmk-3(ok169)* mutant BAG cells.  
560 N > 28 animals/genotype. *P* = 0.0007, unpaired t-test. Error bars represent SEM.

561  
562  
563

564 **Figure 2: Mutation of genes required for regulated neuronal secretion suppress the**  
565 **defects caused by loss of PMK-3.**

566 A-B. Overlays of DIC and fluorescence micrographs of a *pmk-3(wz31)* mutant (A) and a *pmk-*  
567 *3(wz31)* mutant animal carrying the suppressor mutation *wz75* (B) expressing *P<sub>flp-17::GFP</sub>*.  
568 (Scale bar: 10  $\mu$ m).

569 C. Penetrance of *P<sub>flp-17::GFP</sub>* expression in the wild type, *pmk-3(wz31)*, *pmk-3(wz31) sup(wz75)*  
570 mutant animals, and in animals carrying a mutation in the suppressor gene on its own,  
571 *sup(e169)*.

572 D. Structure of the *unc-31* locus. *wz75*, *wz76*, *wz112*, *wz127* and *wz130* are 5 non-  
573 complementing alleles isolated by our *pmk-3* suppressor screen, and *e169* is the *unc-31*  
574 reference allele.

575 E. Genes that function with UNC-31/CAPS to regulate secretion of dense core vesicles (DCVs).  
576 (VGCC) Voltage-Gated Calcium Channel.

577 F. Penetrance of  $P_{flp-17}::GFP$  expression in the wild type,  $unc-13(e51)$ ,  $unc-18(e81)$ ,  $unc-$   
578  $64(e246)$ ,  $pmk-3$ ,  $unc-13(e51); pmk-3(ok169)$ ,  $pmk-3(ok169); unc-18(e81)$ , and  $unc-64(e246);$   
579  $pmk-3(wz31)$  mutants. Data shown for  $pmk-3$  represent the average penetrance of  $P_{flp-17}::GFP$   
580 expression collected from  $pmk-3(wz31)$  and  $pmk-3(ok169)$  mutant animals.

581 G. Penetrance of  $P_{flp-17}::GFP$  expression in the wild type,  $egl-19(n582)$ ,  $unc-2(e55)$ ,  $pmk-$   
582  $3(ok169)$ ,  $pmk-3(ok169) egl-19(n582)$ , and  $pmk-3(ok169); unc-2(e55)$  mutants.

583 N > 25 animals/ genotype. (\*)  $P < 0.05$ ; (\*\*)  $P < 0.01$ , (\*\*\*\*)  $P < 0.0001$ , chi-square test.

584

585 **Figure 3: Electrical activity in BAG neurons during development regulates expression of**  
586 **a PMK-3-regulated gene.**

587 A. Silencing BAG neural activity using  $P_{gcy-9}::irk-1$  strongly restores the penetrance of  $P_{flp-17}::GFP$   
588 expression to  $pmk-3(ok169)$  mutant BAG cells. Similar effects are observed when pan-neuronal  
589 activity is silenced using  $P_{rab-3}::irk-1$ .

590 B. BAG-targeted knockdown of  $unc-31$  using RNAi,  $P_{gcy-9}::unc-31$  RNAi, is sufficient to strongly  
591 restore the penetrance of  $P_{flp-17}::GFP$  expression to  $pmk-3(ok169)$  mutant BAG cells, similar to  
592 pan-neuronal RNAi of  $unc-31$ ,  $P_{rab-3}::unc-31$  RNAi.

593 N ≥ 25 animals/genotype. (\*\*\*\*)  $P < 0.0001$ , chi-square test.

594 C. Animals carrying a transgene for heat-shock-inducible overexpression of  $irk-1$ ,  $P_{hsp}::irk-1$ ,  
595 were heat-shocked at different developmental stages (embryonic, larval or adult) to induce  $irk-1$   
596 expression and reduce neural activity.

597 D. Percentage of animals expressing  $P_{flp-17}::GFP$  in  $pmk-3(ok169)$  and  $pmk-3(ok169); P_{hsp}::irk-$   
598  $1$  mutant animals that had been heat shocked at the indicated developmental stages. N > 95

599 animals for all measurements. (\*\*\*\*)  $P < 0.0001$ , ordinary one-way ANOVA followed by Dunnet's  
600 multiple comparison test. Bar graph data are plotted as means  $\pm$  SEM.

601  
602 **Figure 4: PMK-3 represses expression of genes encoding insulin-like peptides in BAG**  
603 **chemosensory neurons.**

604 A. Heatmap showing the relative expression of the most differentially expressed genes ( $P <$   
605  $0.001$ , 129 transcripts) between wild-type (WT) and *pmk-3(wz31)*. Expression of these  
606 transcripts in non-BAG cells is also shown. Colors represents standardized Z-scores calculated  
607 from the average normalized DeSeq2 read counts, with blue representing low expression and  
608 red representing high expression.

609 B. Principal component analysis of the transcriptomes from wild-type BAG cells, *pmk-3(wz31)*  
610 mutant BAG cells, and non-BAG cells. Each dot represents one biological replicate.

611 C. Fold-changes of gene expression for insulin like peptides (ILPs) in *pmk-3(wz31)* mutant BAG  
612 cells versus wild-type BAG cells. N = 2 biological replicates. (\*)  $P < 0.05$ . (\*\*)  $P < 0.01$ . (\*\*\*)  $P <$   
613  $0.001$ . (\*\*\*\*)  $P < 0.0001$ .  $P$  values were adjusted for False Discovery Rates (FDR) using DeSeq2  
614 (Love et al. 2014).

615 (D-G). Read coverage histograms for a subset of indicated ILPs that are significantly  
616 overexpressed in *pmk-3(wz31)* mutant BAG cells. (see Materials and Methods).

617  
618 **Figure 5: Autocrine insulin signaling antagonizes PMK-3-dependent neuropeptide**  
619 **expression in BAG neurons.**

620 A. Structure of the *daf-28* locus showing the null allele, *tm2308A*, and the dominant negative  
621 (dn) *sa191* allele, a point mutation that disrupts production of multiple insulin-like peptides.

622 B. Disrupting insulin production in *pmk-3(ok169)* mutant BAG cells by overexpressing  
623 *daf-28(sa191)*,  $P_{BAG}::daf-28(sa191)$ , strongly restores  $P_{flp-17}::GFP$  expression to *pmk-3(ok169)*  
624 mutants. The chromosomal *daf-28(sa191)* mutation also partially restores the percentage of  
625 *pmk-3(ok169)* mutants expressing  $P_{flp-17}::GFP$ . (\*\*\*)  $P = 0.0002$ , (\*\*\*\*)  $P < 0.0001$ , unpaired t-  
626 test.

627 C. *daf-28(tm2308)* partially restores the percentage of *pmk-3(ok169)* mutant animals expressing  
628  $P_{flp-17}::GFP$ . (\*\*\*\*)  $P < 0.0001$ , unpaired t-test.

629 D. A canonical insulin signaling pathway conserved between nematodes and vertebrates.

630 E. Percent animals expressing  $P_{flp-17}::GFP$  in *pmk-3(ok169)*, *daf-2(e1370); pmk-3(ok169)*,  
631 *age-1(hx546); pmk-3(ok169)*, *pmk-3(ok169); akt-1(ok525)*, and *pmk-3(ok169); akt-2(ok393)*  
632 mutant animals. For the *pmk-3* versus *daf-2*; *pmk-3* and *pmk-3* versus *age-1*; *pmk-3*  
633 comparisons,  $P = 0.0016$  and  $P < 0.0001$ , respectively, unpaired t-test. For the *pmk-3* versus  
634 *pmk-3; akt-1* and *pmk-3* versus *pmk-3; akt-2* comparisons,  $P < 0.0001$  and  $P = 0.9524$ ,  
635 respectively, ordinary one-way ANOVA followed by Dunnet's multiple comparisons test.

636 F. BAG cell-targeted knockdown of *daf-2* using RNAi is sufficient to strongly restore  $P_{flp-17}::GFP$   
637 expression to *pmk-3(ok169)* mutant BAG cells, even in the absence of *daf-16(wz151)*. (\*\*\*\*)  $P <$   
638  $0.0001$ . For *pmk-3; P<sub>BAG</sub>::daf-2 RNAi* versus *daf-16; pmk-3; P<sub>BAG</sub>::daf-2 RNAi*,  $P = 0.2612$ .  $P -$   
639 values were calculated with an ordinary one-way ANOVA followed by Tukey's multiple  
640 comparisons test.

641 N  $\geq$  45 animals/genotype. Bar graph data are plotted as means  $\pm$  SEM.

642

643 **Figure 6: *pmk-3* mutant BAG neurons experience increased insulin signaling.**

644 A. Fluorescence micrographs of wild-type and *daf-2(e1370)* mutant animals expressing GFP-  
645 tagged DAF-16 in the BAG cell,  $P_{BAG}::daf-16::GFP$ . (Scale bar: 5  $\mu$ m). (N) nucleus.  
646 B. Cumulative probability plots of the nuclear to cytoplasmic DAF-16::GFP fluorescence ratios  
647 in wild-type and *pmk-3(ok169)* mutant BAG cells. N = 36 cells from 27 animals for the wild-type  
648 and N = 35 cells from 23 animals for *pmk-3* mutants.  $P = 0.0011$ , unpaired t-test.  
649 C. The nuclear-to-cytoplasmic DAF-16::GFP fluorescence ratio is not significantly different  
650 between *daf-2(e1370)* and *daf-2(e1370); pmk-3(ok169)* mutant animals. N = 46 cells from 30  
651 animals for *daf-2* mutants and N = 45 cells from 28 animals for *daf-2; pmk-3* mutant animals.  $P$   
652 = 0.2094, unpaired t-test.

653

654 **Figure 7: Disruption of autocrine insulin signaling restores function to *pmk-3* mutant**  
655 **BAG neurons.**

656 A. CO<sub>2</sub>-avoidance indices of the wild type, *daf-28(sa191)*, *pmk-3(ok169)*, and *pmk-3(ok169);*  
657 *daf-28(sa191)* mutants.

658 B. Reducing insulin secretion in *pmk-3(ok169)* mutant BAG cells by overexpressing  
659 *daf-28(sa191)*,  $P_{BAG}::daf-28(sa191)$ , significantly restored CO<sub>2</sub> avoidance behavior to  
660 *pmk-3(ok169)* mutants.

661 C. BAG cell-targeted knockdown of the insulin receptor *daf-2* significantly restores CO<sub>2</sub>  
662 avoidance behavior to *pmk-3(ok169)* mutant animals.

663 N  $\geq$  10 trials.  $P$  values were determined by an unpaired t-test.

664 D. Model for p38 MAPK regulation of BAG neuron development via regulation of an activity-  
665 dependent autocrine insulin signal.

666

667

668 **Supplementary Files**

669 **Supplementary File 1. *C. elegans* strains used in this study.**

670 A table of the *C. elegans* strains used in this study.

671

672 **Supplementary File 2. Plasmids used in this study.**

673 A table of the plasmids constructed in this study, and a table of the plasmids injected and  
674 associated concentration.

675

676

677 **References**

- 678 Anders SP, P.T.; Huber, W. 2014. HTSeq - A Python framework to work with high-throughput  
679 sequencing data. *Bioinformatics* **31**: 166-169. DOI: 10.1101/002824.
- 680 Barbagallo B, Philbrook A, Touroutine D, Banerjee N, Oliver D, Lambert CM, Francis MM.  
681 2017. Excitatory neurons sculpt GABAergic neuronal connectivity in the *C. elegans*  
682 motor circuit. *Development* **144**: 1807-1819. DOI: 10.1242/dev.141911.
- 683 Brandt JP, Aziz-Zaman S, Juozaityte V, Martinez-Velazquez LA, Petersen JG, Pocock R,  
684 Ringstad N. 2012. A single gene target of an ETS-family transcription factor determines  
685 neuronal CO<sub>2</sub>-chemosensitivity. *PLoS One* **7**: e34014. DOI:  
686 10.1371/journal.pone.0034014.
- 687 Brandt Julia P, Ringstad N. 2015. Toll-like Receptor Signaling Promotes Development and  
688 Function of Sensory Neurons Required for a *C. elegans* Pathogen-Avoidance Behavior.  
689 *Current Biology*: 1-11. DOI: 10.1016/j.cub.2015.07.037.
- 690 Brenner S. 1974. The genetics of *Caenorhabditis elegans*. *Genetics* **77**: 71-94.
- 691 Chell JM, Brand AH. 2010. Nutrition-responsive glia control exit of neural stem cells from  
692 quiescence. *Cell* **143**: 1161-1173. DOI: 10.1016/j.cell.2010.12.007.
- 693 Christensen ME, A.; Yin, X.; Fox, R.; Morrison, R.; McDonnell, M.; Gleason, C.; Miller III, D.M.;  
694 Strange, K. 2002. A primary culture system for functional analysis of *C. elegans*  
695 neurons and muscle cells. *Neuron* **33**: 503-514.
- 696 Cornils A, Gloeck M, Chen Z, Zhang Y, Alcedo J. 2011. Specific insulin-like peptides encode  
697 sensory information to regulate distinct developmental processes. *Development* **138**:  
698 1183-1193. DOI: 10.1242/dev.060905.
- 699 D'Ercole AJ, Ye P, Calikoglu AS, Gutierrez-Ospina G. 1996. The role of the insulin-like growth  
700 factors in the central nervous system. *Mol Neurobiol* **13**: 227-255. DOI:  
701 10.1007/BF02740625.
- 702 Davis MW, Hammarlund M, Harrach T, Hullett P, Olsen S, Jorgensen EM. 2005. Rapid single  
703 nucleotide polymorphism mapping in *C. elegans*. *BMC Genomics* **6**: 118. DOI:  
704 10.1186/1471-2164-6-118.

- 705 Dobin A, Davis CA, Schlesinger F, Drenkow J, Zaleski C, Jha S, Batut P, Chaisson M,  
706 Gingeras TR. 2013. STAR: ultrafast universal RNA-seq aligner. *Bioinformatics* **29**: 15-  
707 21. DOI: 10.1093/bioinformatics/bts635.
- 708 Emtage L, Aziz-Zaman S, Padovan-Merhar O, Horvitz HR, Fang-Yen C, Ringstad N. 2012.  
709 IRK-1 potassium channels mediate peptidergic inhibition of *Caenorhabditis elegans*  
710 serotonin neurons via a G(o) signaling pathway. *J Neurosci* **32**: 16285-16295. DOI:  
711 10.1523/JNEUROSCI.2667-12.2012.
- 712 Feinberg EH, Vanhoven MK, Bendesky A, Wang G, Fetter RD, Shen K, Bargmann CI. 2008.  
713 GFP Reconstitution Across Synaptic Partners (GRASP) defines cell contacts and  
714 synapses in living nervous systems. *Neuron* **57**: 353-363. DOI:  
715 10.1016/j.neuron.2007.11.030.
- 716 Fernandez AM, Torres-Aleman I. 2012. The many faces of insulin-like peptide signalling in the  
717 brain. *Nat Rev Neurosci* **13**: 225-239. DOI: 10.1038/nrn3209.
- 718 Gibson DG, Young L, Chuang RY, Venter JC, Hutchison CA, 3rd, Smith HO. 2009. Enzymatic  
719 assembly of DNA molecules up to several hundred kilobases. *Nat Methods* **6**: 343-345.  
720 DOI: 10.1038/nmeth.1318.
- 721 Gramstrup Petersen J, Pocock R. 2013. Neuronal cell fate decisions: O<sub>2</sub> and CO<sub>2</sub> sensing  
722 neurons require *egl-13/Sox5*. *Worm* **2**: e27284. DOI: 10.4161/worm.27284.
- 723 Gruner M, Nelson D, Winbush A, Hintz R, Ryu L, Chung SH, Kim K, Gabel CV, van der Linden  
724 AM. 2014. Feeding state, insulin and NPR-1 modulate chemoreceptor gene expression  
725 via integration of sensory and circuit inputs. *PLoS Genet* **10**: e1004707. DOI:  
726 10.1371/journal.pgen.1004707.
- 727 Guillermin Manon L, Carrillo Mayra A, Hallem Elissa A. 2017. A Single Set of Interneurons  
728 Drives Opposite Behaviors in *C. elegans*. *Current Biology* **27**: 2630-2639.e2636. DOI:  
729 10.1016/j.cub.2017.07.023.
- 730 Guillermin ML, Castelletto ML, Hallem EA. 2011. Differentiation of carbon dioxide-sensing  
731 neurons in *Caenorhabditis elegans* requires the ETS-5 transcription factor. *Genetics*  
732 **189**: 1327-1339. DOI: 10.1534/genetics.111.133835.
- 733 Harward SC, Hedrick NG, Hall CE, Parra-Bueno P, Milner TA, Pan E, Laviv T, Hempstead BL,  
734 Yasuda R, McNamara JO. 2016. Autocrine BDNF-TrkB signalling within a single  
735 dendritic spine. *Nature* **538**: 99-103. DOI: 10.1038/nature19766.
- 736 Herrmann KA, Broihier HT. 2018. What neurons tell themselves: autocrine signals play  
737 essential roles in neuronal development and function. *Curr Opin Neurobiol* **51**: 70-79.  
738 DOI: 10.1016/j.conb.2018.03.002.
- 739 Hobert O. 2016. Terminal Selectors of Neuronal Identity. *Curr Top Dev Biol* **116**: 455-475. DOI:  
740 10.1016/bs.ctdb.2015.12.007.
- 741 Hobert O, Glenwinkel L, White J. 2016. Revisiting Neuronal Cell Type Classification in  
742 *Caenorhabditis elegans*. *Current Biology* **26**: R1197-R1203. DOI:  
743 10.1016/j.cub.2016.10.027.
- 744 James RE, Hoover KM, Bulgari D, McLaughlin CN, Wilson CG, Wharton KA, Levitan ES,  
745 Broihier HT. 2014. Crimpy enables discrimination of presynaptic and postsynaptic pools  
746 of a BMP at the *Drosophila* neuromuscular junction. *Dev Cell* **31**: 586-598. DOI:  
747 10.1016/j.devcel.2014.10.006.
- 748 Kenyon CC, J.; Gensch, E.; Rudner, A.; Tabtiang, R. 1993. A *C. elegans* mutant that lives  
749 twice as long as wild type. *Nature* **366**: 461-464.

- 750 Kim H, Ishidate T, Ghanta KS, Seth M, Conte D, Jr., Shirayama M, Mello CC. 2014. A co-  
751 CRISPR strategy for efficient genome editing in *Caenorhabditis elegans*. *Genetics* **197**:  
752 1069-1080. DOI: 10.1534/genetics.114.166389.
- 753 Kim K, Li C. 2004. Expression and regulation of an FMRFamide-related neuropeptide gene  
754 family in *Caenorhabditis elegans*. *The Journal of comparative neurology* **475**: 540-550.  
755 DOI: 10.1002/cne.20189.
- 756 Kimura KDT, H. A.; Liu, Y.; Ruvkun, F. 1997. *daf-2*, an Insulin Receptor-Like Gene That  
757 Regulates Longevity and Diapause in *Caenorhabditis elegans*. *Science* **277**: 942-946.
- 758 Lee JS, Shih PY, Schaedel ON, Quintero-Cadena P, Rogers AK, Sternberg PW. 2017.  
759 FMRFamide-like peptides expand the behavioral repertoire of a densely connected  
760 nervous system. *Proc Natl Acad Sci U S A* **114**: E10726-E10735. DOI:  
761 10.1073/pnas.1710374114.
- 762 Lee RYNH, J.; Ruvkun, G. 2001. Regulation of *C. elegans* DAF-16 and its human ortholog  
763 FKHL1 by the *daf-2* insulin-like signaling pathway. *Current Biology* **11**: 1950-1957.
- 764 Lee RYNL, L.; Hengartner, M.; Horvitz, H.R.; Avery, L. 1997. Mutations in the alpha1 subunit of  
765 an L-type voltage-activated Ca<sup>2+</sup> channel cause myotonia in *Caenorhabditis elegans*.  
766 *The EMBO Journal* **16**: 6066-6076.
- 767 Lehtinen MK, Zappaterra MW, Chen X, Yang YJ, Hill AD, Lun M, Maynard T, Gonzalez D, Kim  
768 S, Ye P et al. 2011. The cerebrospinal fluid provides a proliferative niche for neural  
769 progenitor cells. *Neuron* **69**: 893-905. DOI: 10.1016/j.neuron.2011.01.023.
- 770 Li W, Kennedy SG, Ruvkun G. 2003. *daf-28* encodes a *C. elegans* insulin superfamily member  
771 that is regulated by environmental cues and acts in the DAF-2 signaling pathway.  
772 *Genes Dev* **17**: 844-858. DOI: 10.1101/gad.1066503.
- 773 Lin KH, H.; Libina, N.; Kenyon, C. 2001. Regulation of the *Caenorhabditis elegans* longevity  
774 protein DAF-16 by insulin/IGF-1 and germline signaling. *Nature Genetics* **28**.
- 775 Love MI, Huber W, Anders S. 2014. Moderated estimation of fold change and dispersion for  
776 RNA-seq data with DESeq2. *Genome Biol* **15**: 550. DOI: 10.1186/s13059-014-0550-8.
- 777 Mairet-Coello G, Tury A, DiCicco-Bloom E. 2009. Insulin-like growth factor-1 promotes G(1)/S  
778 cell cycle progression through bidirectional regulation of cyclins and cyclin-dependent  
779 kinase inhibitors via the phosphatidylinositol 3-kinase/Akt pathway in developing rat  
780 cerebral cortex. *J Neurosci* **29**: 775-788. DOI: 10.1523/JNEUROSCI.1700-08.2009.
- 781 Mardinly AR, Spiegel I, Patrizi A, Centofante E, Bazinet JE, Tzeng CP, Mandel-Brehm C,  
782 Harmin DA, Adesnik H, Fagiolini M et al. 2016. Sensory experience regulates cortical  
783 inhibition by inducing IGF1 in VIP neurons. *Nature* **531**: 371-375. DOI:  
784 10.1038/nature17187.
- 785 Mello CK, J. M.; Stinchcomb, D.; Ambros, V. 1991. Efficient gene transfer in *C. elegans*  
786 extrachromosomal maintenance and integration of transforming sequences. *The EMBO*  
787 *Journal* **10**: 3959-3970.
- 788 Morris JZT, H. A.; Ruvkun, G. 1996. A phosphatidylinositol-3-OH kinase family member  
789 regulating longevity and diapause in *Caenorhabditis elegans*. *Nature* **382**: 536-539.
- 790 Mukhopadhyay S, Lu Y, Shaham S, Sengupta P. 2008. Sensory signaling-dependent  
791 remodeling of olfactory cilia architecture in *C. elegans*. *Dev Cell* **14**: 762-774. DOI:  
792 10.1016/j.devcel.2008.03.002.
- 793 Murphy CT, Hu PJ. 2013. Insulin/insulin-like growth factor signaling in *C. elegans*. *WormBook*:  
794 1-43. DOI: 10.1895/wormbook.1.164.1.



- 795 Nagai T, Yamada S, Tominaga T, Ichikawa M, Miyawaki A. 2004. Expanded dynamic range of  
796 fluorescent indicators for Ca(2+) by circularly permuted yellow fluorescent proteins. *Proc*  
797 *Natl Acad Sci U S A* **101**: 10554-10559. DOI: 10.1073/pnas.0400417101.
- 798 Neuwirth E. 2014. RColorBrewer: ColorBrewer Palettes. R Package, Version 1.1-2.
- 799 Paix AF, A.; Rasoloson, D.; Seydoux, G. 2015. High efficiency, homology-directed genome  
800 editing in *C. elegans* using CRISPR/Cas9 ribonucleoprotein complexes. *Genetics* **208**.
- 801 Paradis SR, G. 1998. *Caenorhabditis elegans* Akt/PKB transduces insulin receptor-like signals  
802 from AGE-1 KI3 kinase to the DAF-16 transcription factor. *Genes and Development* **12**:  
803 2488-2498.
- 804 Peckol EL, Troemel ER, Bargmann CI. 2001. Sensory experience and sensory activity regulate  
805 chemosensory receptor gene expression in *Caenorhabditis elegans*. *Proc Natl Acad Sci*  
806 *U S A* **98**: 11032-11038. DOI: 10.1073/pnas.191352498.
- 807 Peckol ELZ, J.A.; Yarrow, J.C.; Barmann, C.I. 1999. Sensory activity affects sensory axon  
808 development in *C. elegans*. *Development* **126**: 1891-1902.
- 809 Richmond JED, W. S.; Jorgensen, E. M. . 1999. UNC-13 is required for synaptic vesicle fusion  
810 in *C. elegans*. *Nature* **2**: 959-964.
- 811 Ringstad N, Horvitz HR. 2008. FMRFamide neuropeptides and acetylcholine synergistically  
812 inhibit egg-laying by *C. elegans*. *Nature neuroscience* **11**: 1168-1176. DOI:  
813 10.1038/nn.2186.
- 814 Rojo Romanos T, Petersen JG, Pocock R. 2017. Control of Neuropeptide Expression by  
815 Parallel Activity-dependent Pathways in *Caenorhabditis elegans*. *Sci Rep* **7**: 38734.  
816 DOI: 10.1038/srep38734.
- 817 Rojo Romanos T, Petersen JG, Riveiro AR, Pocock R. 2015. A novel role for the zinc-finger  
818 transcription factor EGL-46 in the differentiation of gas-sensing neurons in  
819 *Caenorhabditis elegans*. *Genetics* **199**: 157-163. DOI: 10.1534/genetics.114.172049.
- 820 Sagasti AH, N.; Hyodo, J.; Tanaka, M.; Matsumoto, K.; Bargmann, C.I. 2001. The CamKII  
821 UNC-43 activates the MAPKKK NSY-1 to execute a lateral signaling decision required  
822 for asymmetric olfactory neuron fates. *Cell* **105**: 221-232.
- 823 Saifee OW, L.; Nonet, M.L. 1998. The *Caenorhabditis elegans unc-64* locus encodes a  
824 syntaxin that interacts genetically with synaptobrevin. *Molecular Biology of the Cell* **9**:  
825 1235-1252.
- 826 Schafer WRK, C.J. 1995. A calcium-channel homologue required for adaptation to dopamine  
827 and serotonin in *Caenorhabditis elegans*. *Nature* **375**: 73-78.
- 828 Schindelin J, Arganda-Carreras I, Frise E, Kaynig V, Longair M, Pietzsch T, Preibisch S,  
829 Rueden C, Saalfeld S, Schmid B et al. 2012. Fiji: an open-source platform for biological-  
830 image analysis. *Nat Methods* **9**: 676-682. DOI: 10.1038/nmeth.2019.
- 831 Serrano-Saiz E, Poole RJ, Felton T, Zhang F, De La Cruz ED, Hobert O. 2013. Modular  
832 control of glutamatergic neuronal identity in *C. elegans* by distinct homeodomain  
833 proteins. *Cell* **155**: 659-673. DOI: 10.1016/j.cell.2013.09.052.
- 834 Smith ES, Martinez-Velazquez L, Ringstad N. 2013. A chemoreceptor that detects molecular  
835 carbon dioxide. *J Biol Chem* **288**: 37071-37081. DOI: 10.1074/jbc.M113.517367.
- 836 Sousa-Nunes R, Yee LL, Gould AP. 2011. Fat cells reactivate quiescent neuroblasts via TOR  
837 and glial insulin relays in *Drosophila*. *Nature* **471**: 508-512. DOI: 10.1038/nature09867.
- 838 Speese S, Petrie M, Schuske K, Ailion M, Ann K, Iwasaki K, Jorgensen EM, Martin TF. 2007.  
839 UNC-31 (CAPS) is required for dense-core vesicle but not synaptic vesicle exocytosis in

- 840 Caenorhabditis elegans. *J Neurosci* **27**: 6150-6162. DOI: 10.1523/JNEUROSCI.1466-  
841 07.2007.
- 842 Sulston JEH, H.R. 1977. Post-embryonic Cell Lineage of the Nematode, *Caenorhabditis*  
843 *elegans*. *Developmental Biology* **56**: 110-156.
- 844 Sulston JES, E.; White, J.G.; Thomson, J.N. 1983. The embryonic cell lineage of the nematode  
845 *Caenorhabditis elegans*. *Developmental Biology* **100**: 64-119.
- 846 Terauchi A, Johnson-Venkatesh EM, Bullock B, Lehtinen MK, Umemori H. 2016. Retrograde  
847 fibroblast growth factor 22 (FGF22) signaling regulates insulin-like growth factor 2  
848 (IGF2) expression for activity-dependent synapse stabilization in the mammalian brain.  
849 *Elife* **5**. DOI: 10.7554/eLife.12151.
- 850 Thomas GM, Hagan RL. 2004. MAPK cascade signalling and synaptic plasticity. *Nat Rev*  
851 *Neurosci* **5**: 173-183. DOI: 10.1038/nrn1346.
- 852 Thorvaldsdottir H, Robinson JT, Mesirov JP. 2013. Integrative Genomics Viewer (IGV): high-  
853 performance genomics data visualization and exploration. *Brief Bioinform* **14**: 178-192.  
854 DOI: 10.1093/bib/bbs017.
- 855 Troemel ERS, A.; Bargmann, C.I. 1999. Lateral signaling mediated by axon contact and  
856 calcium entry regulates asymmetric odorant receptor expression in *C. elegans*. *Cell* **99**:  
857 387-398.
- 858 Tullet JM, Hertweck M, An JH, Baker J, Hwang JY, Liu S, Oliveira RP, Baumeister R,  
859 Blackwell TK. 2008. Direct inhibition of the longevity-promoting factor SKN-1 by insulin-  
860 like signaling in *C. elegans*. *Cell* **132**: 1025-1038. DOI: 10.1016/j.cell.2008.01.030.
- 861 Wamsley B, Fishell G. 2017. Genetic and activity-dependent mechanisms underlying  
862 interneuron diversity. *Nat Rev Neurosci* **18**: 299-309. DOI: 10.1038/nrn.2017.30.
- 863 Warnes GRB, B.; Bonebakker, L.; Gentleman, R.; Liaw, W.H.A.; Lumley, T.; Maechler, M.;  
864 Magnusson, A.; Moeller, S.; Schwartz, M.; Venables, B. 2016. gplots: Various R  
865 Programming Tools for Plotting Data, Version 2.14.1.
- 866 Weimer RM, Richmond JE, Davis WS, Hadwiger G, Nonet ML, Jorgensen EM. 2003. Defects  
867 in synaptic vesicle docking in unc-18 mutants. *Nat Neurosci* **6**: 1023-1030. DOI:  
868 10.1038/nn1118.
- 869 West AE, Greenberg ME. 2011. Neuronal activity-regulated gene transcription in synapse  
870 development and cognitive function. *Cold Spring Harb Perspect Biol* **3**. DOI:  
871 10.1101/cshperspect.a005744.
- 872 White JG, Southgate E, Thomson JN, Brenner S. 1986. The structure of the nervous system of  
873 the nematode *Caenorhabditis elegans*. *Philos Trans R Soc Lond B Biol Sci* **314**: 1-340.
- 874 Zamanian M, Cook DE, Zdraljevic S, Brady SC, Lee D, Lee J, Andersen EC. 2018. Discovery  
875 of genomic intervals that underlie nematode responses to benzimidazoles. *PLoS Negl*  
876 *Trop Dis* **12**: e0006368. DOI: 10.1371/journal.pntd.0006368.
- 877 Zhang YM, C.; Delohery, T.; Nasipak, B.; Foat, B.C.; Bounoutas, A.; Bussemak, H.J.; Kim,  
878 S.K.; Chalfie, M. 2002. Identification of genes expressed in *C. elegans* touch receptor  
879 neurons. *Nature* **418**: 331-335.
- 880 Zhou KM, Dong YM, Ge Q, Zhu D, Zhou W, Lin XG, Liang T, Wu ZX, Xu T. 2007. PKA  
881 activation bypasses the requirement for UNC-31 in the docking of dense core vesicles  
882 from *C. elegans* neurons. *Neuron* **56**: 657-669. DOI: 10.1016/j.neuron.2007.09.015.
- 883 Ziegler AN, Chidambaram S, Forbes BE, Wood TL, Levison SW. 2014. Insulin-like growth  
884 factor-II (IGF-II) and IGF-II analogs with enhanced insulin receptor-a binding affinity

885 promote neural stem cell expansion. *J Biol Chem* **289**: 4626-4633. DOI:  
886 10.1074/jbc.M113.537597.

887 Zimmer M, Gray JM, Pokala N, Chang AJ, Karow DS, Marletta MA, Hudson ML, Morton DB,  
888 Chronis N, Bargmann CI. 2009. Neurons detect increases and decreases in oxygen  
889 levels using distinct guanylate cyclases. *Neuron* **61**: 865-879. DOI:  
890 10.1016/j.neuron.2009.02.013.

891  
892  
893  
894  
895  
896  
897  
898  
899  
900  
901  
902  
903

Bayer Horowitz Figure 1

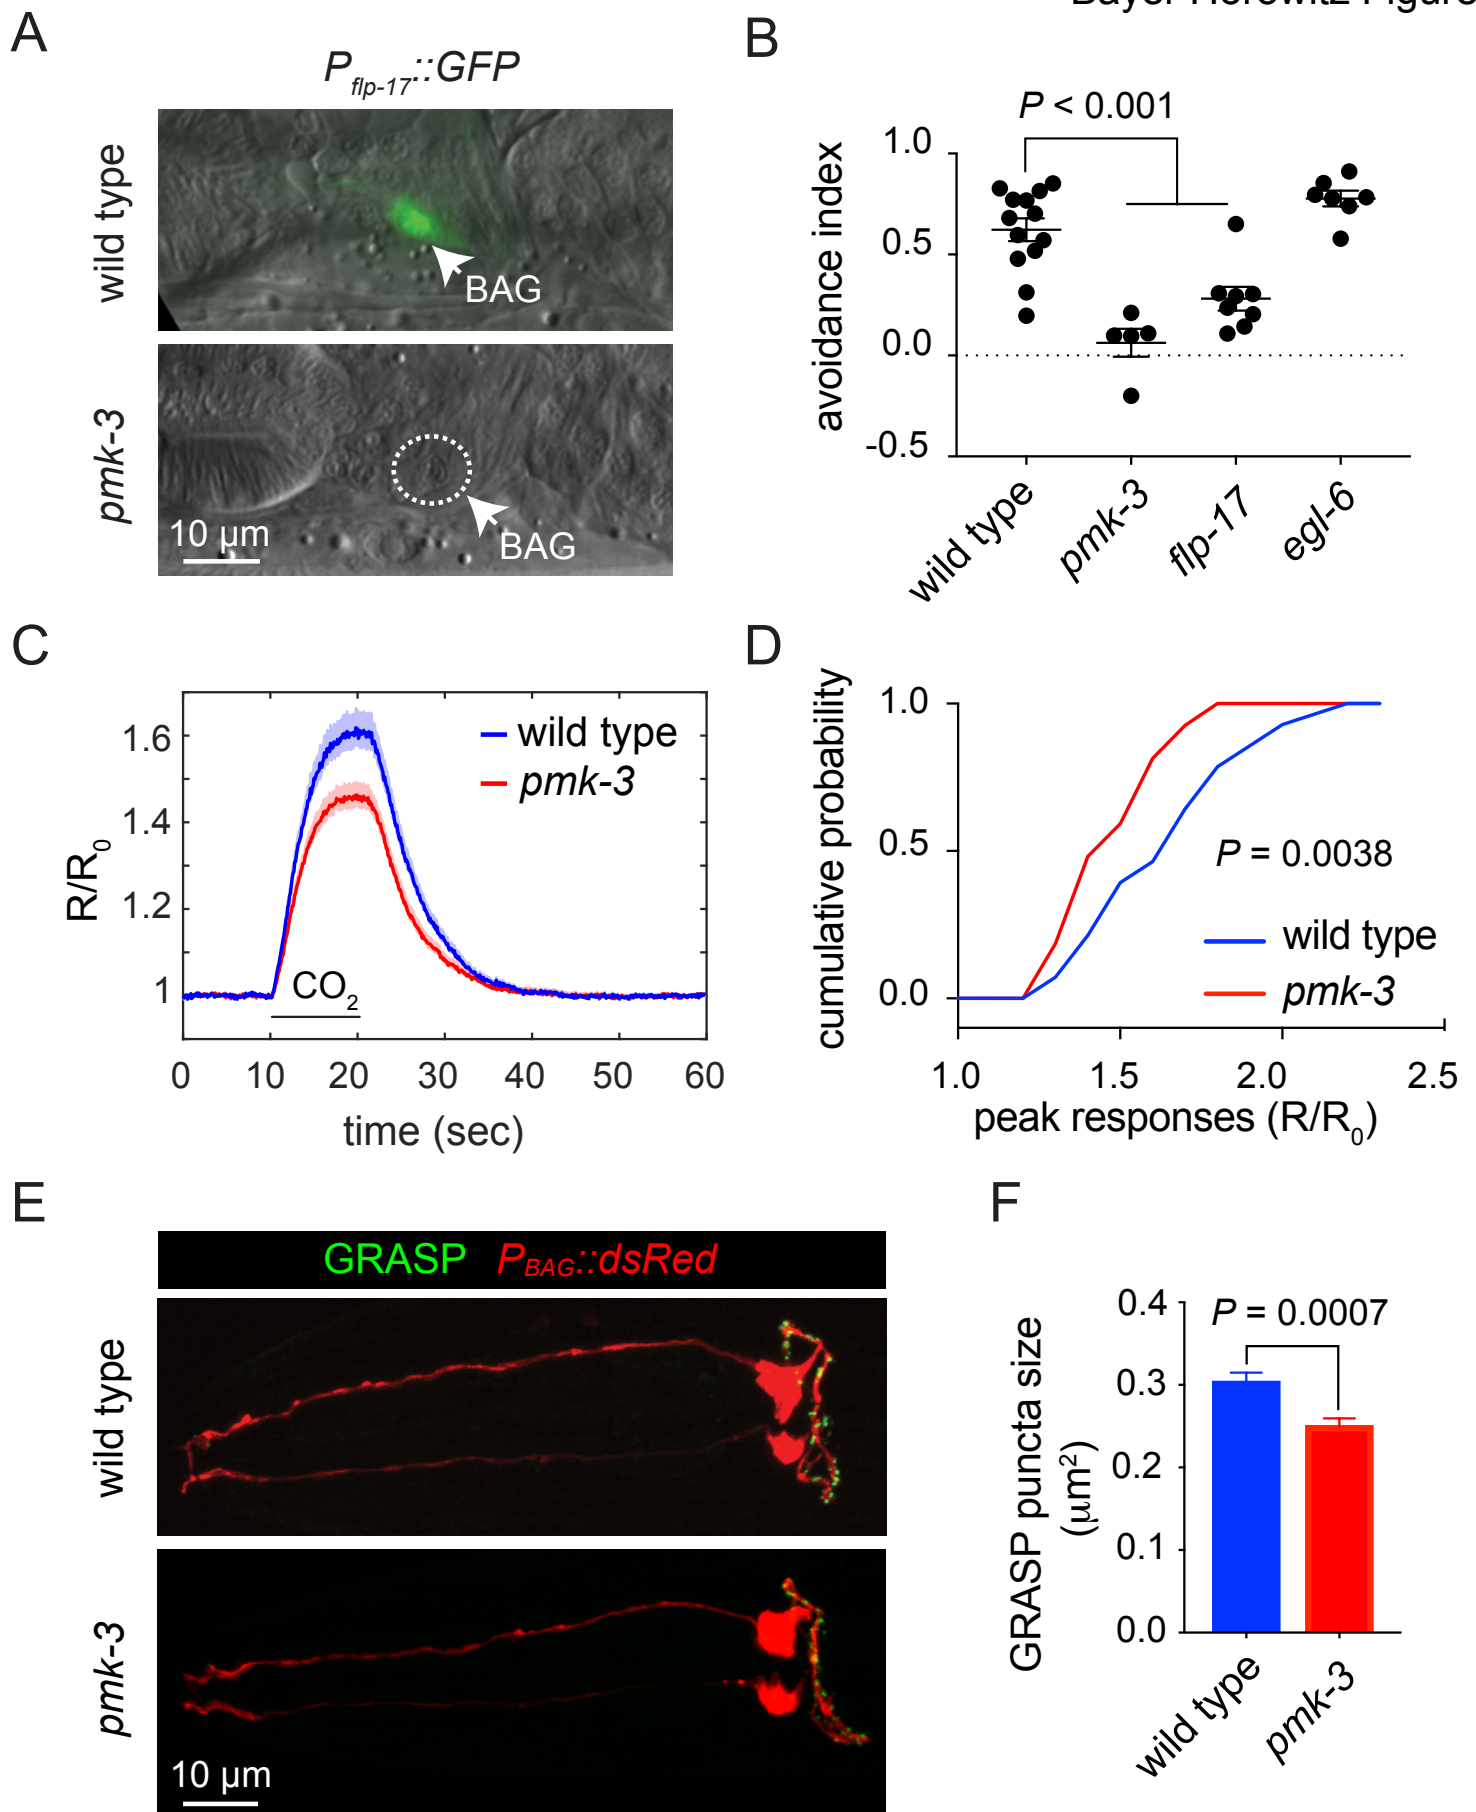

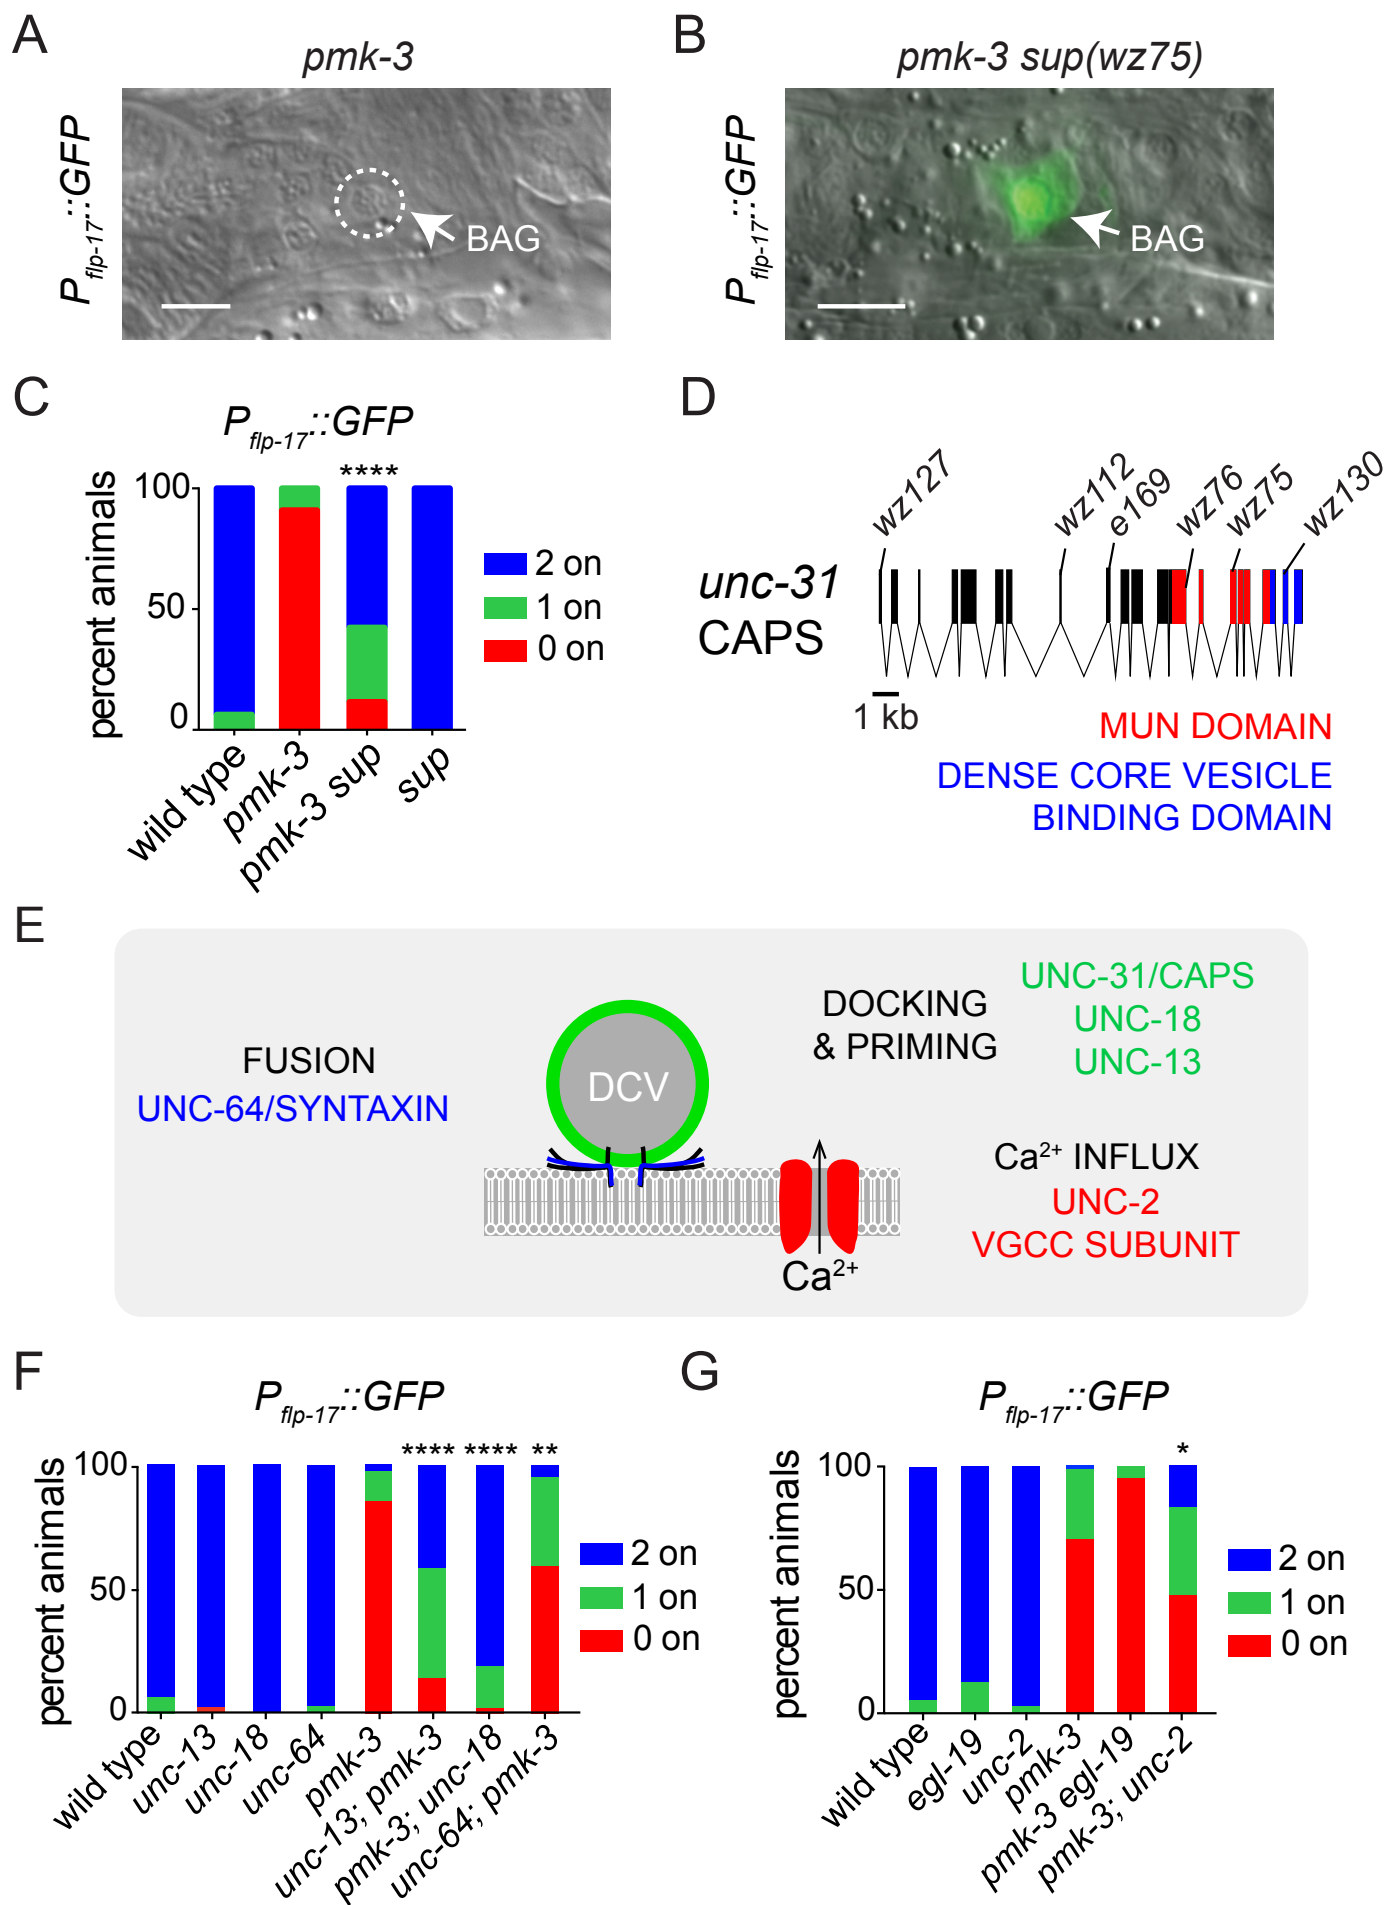

Bayer Horowitz Figure 3

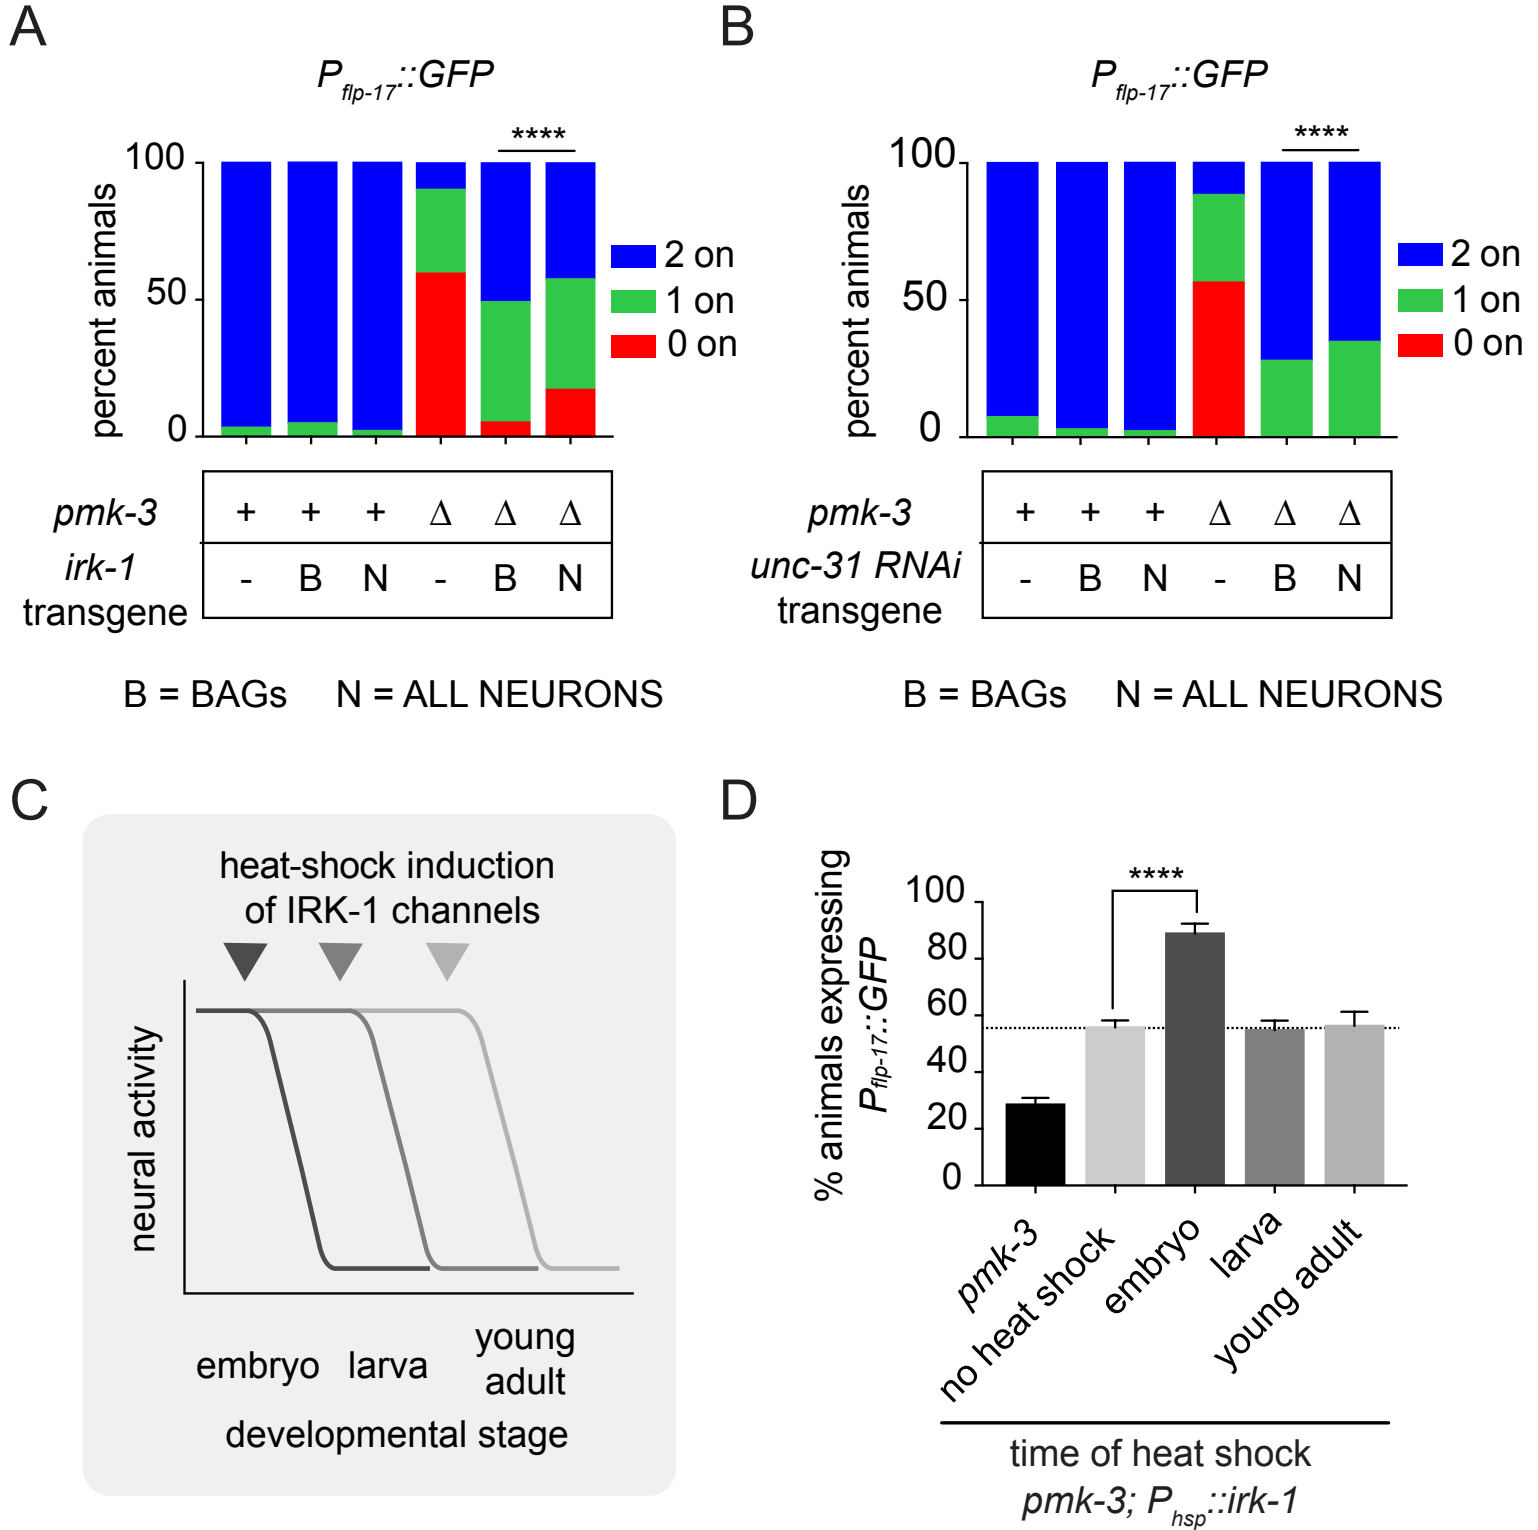

Bayer Horowitz Figure 4

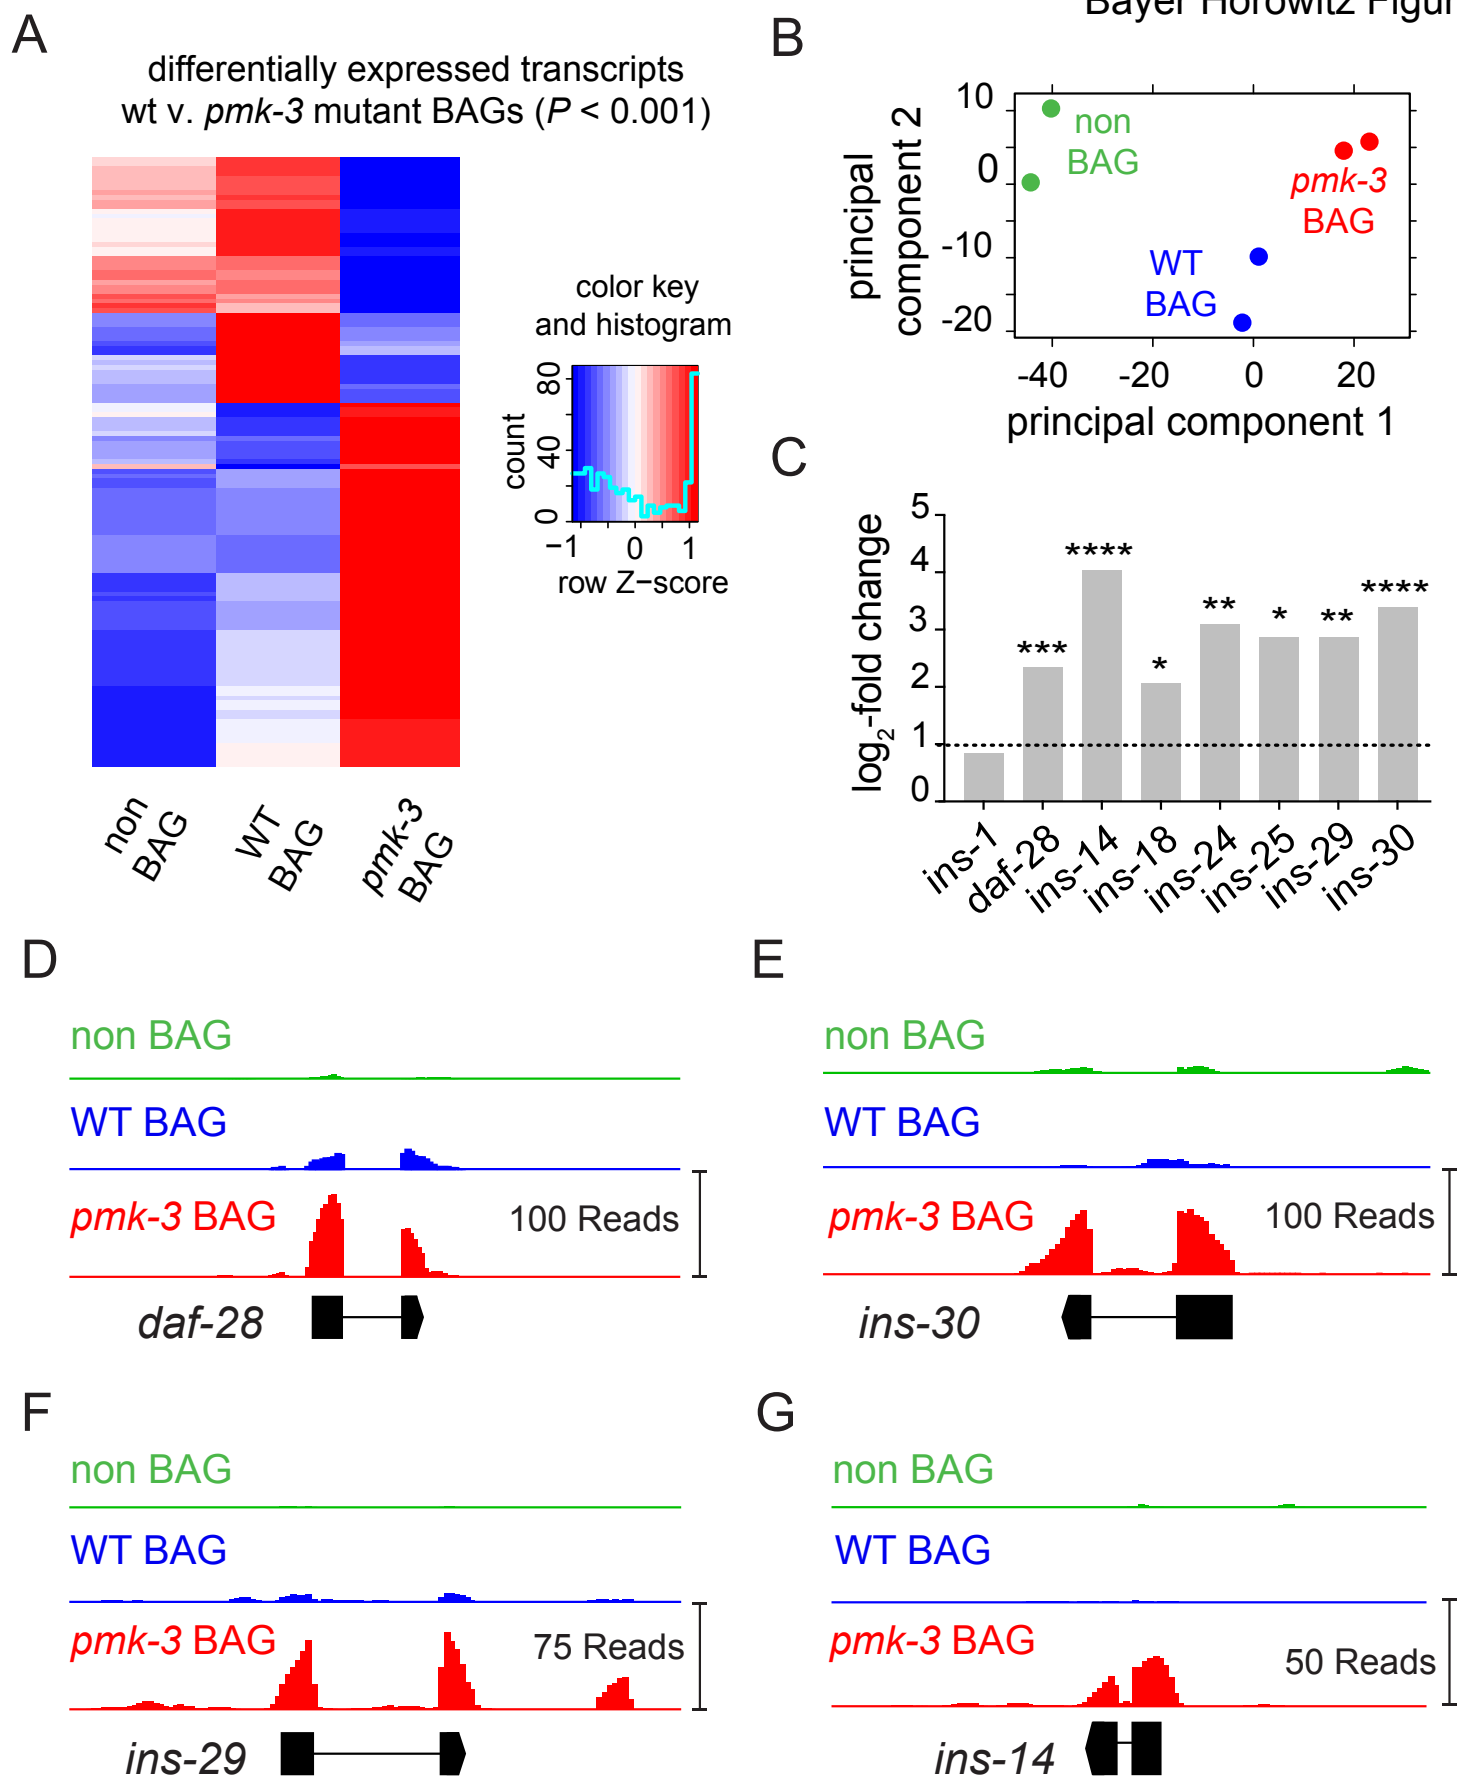

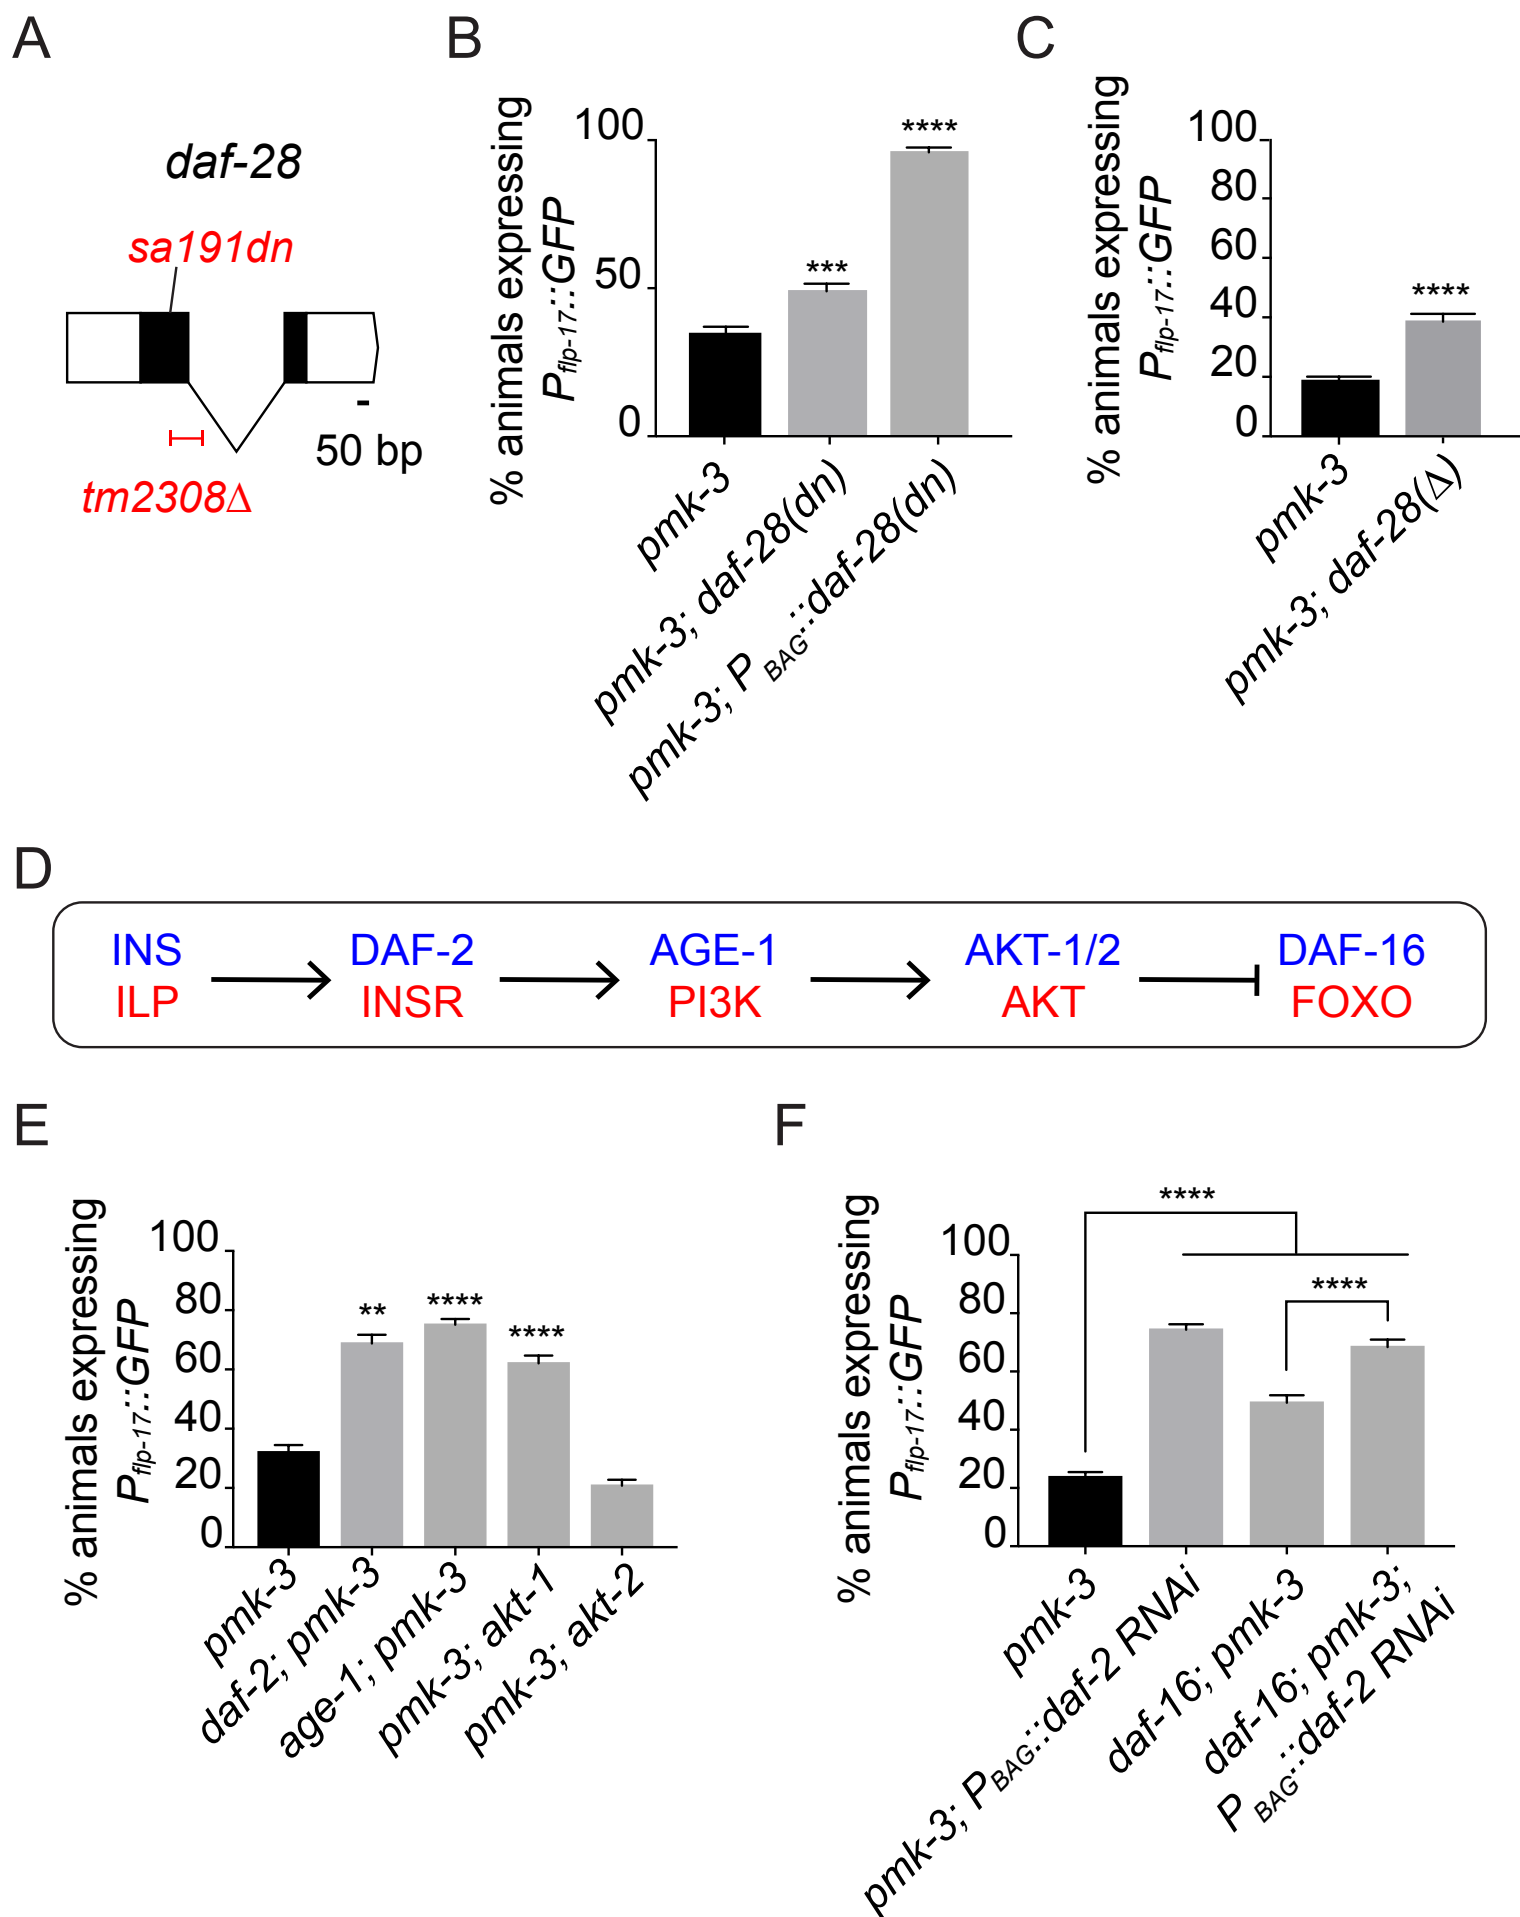



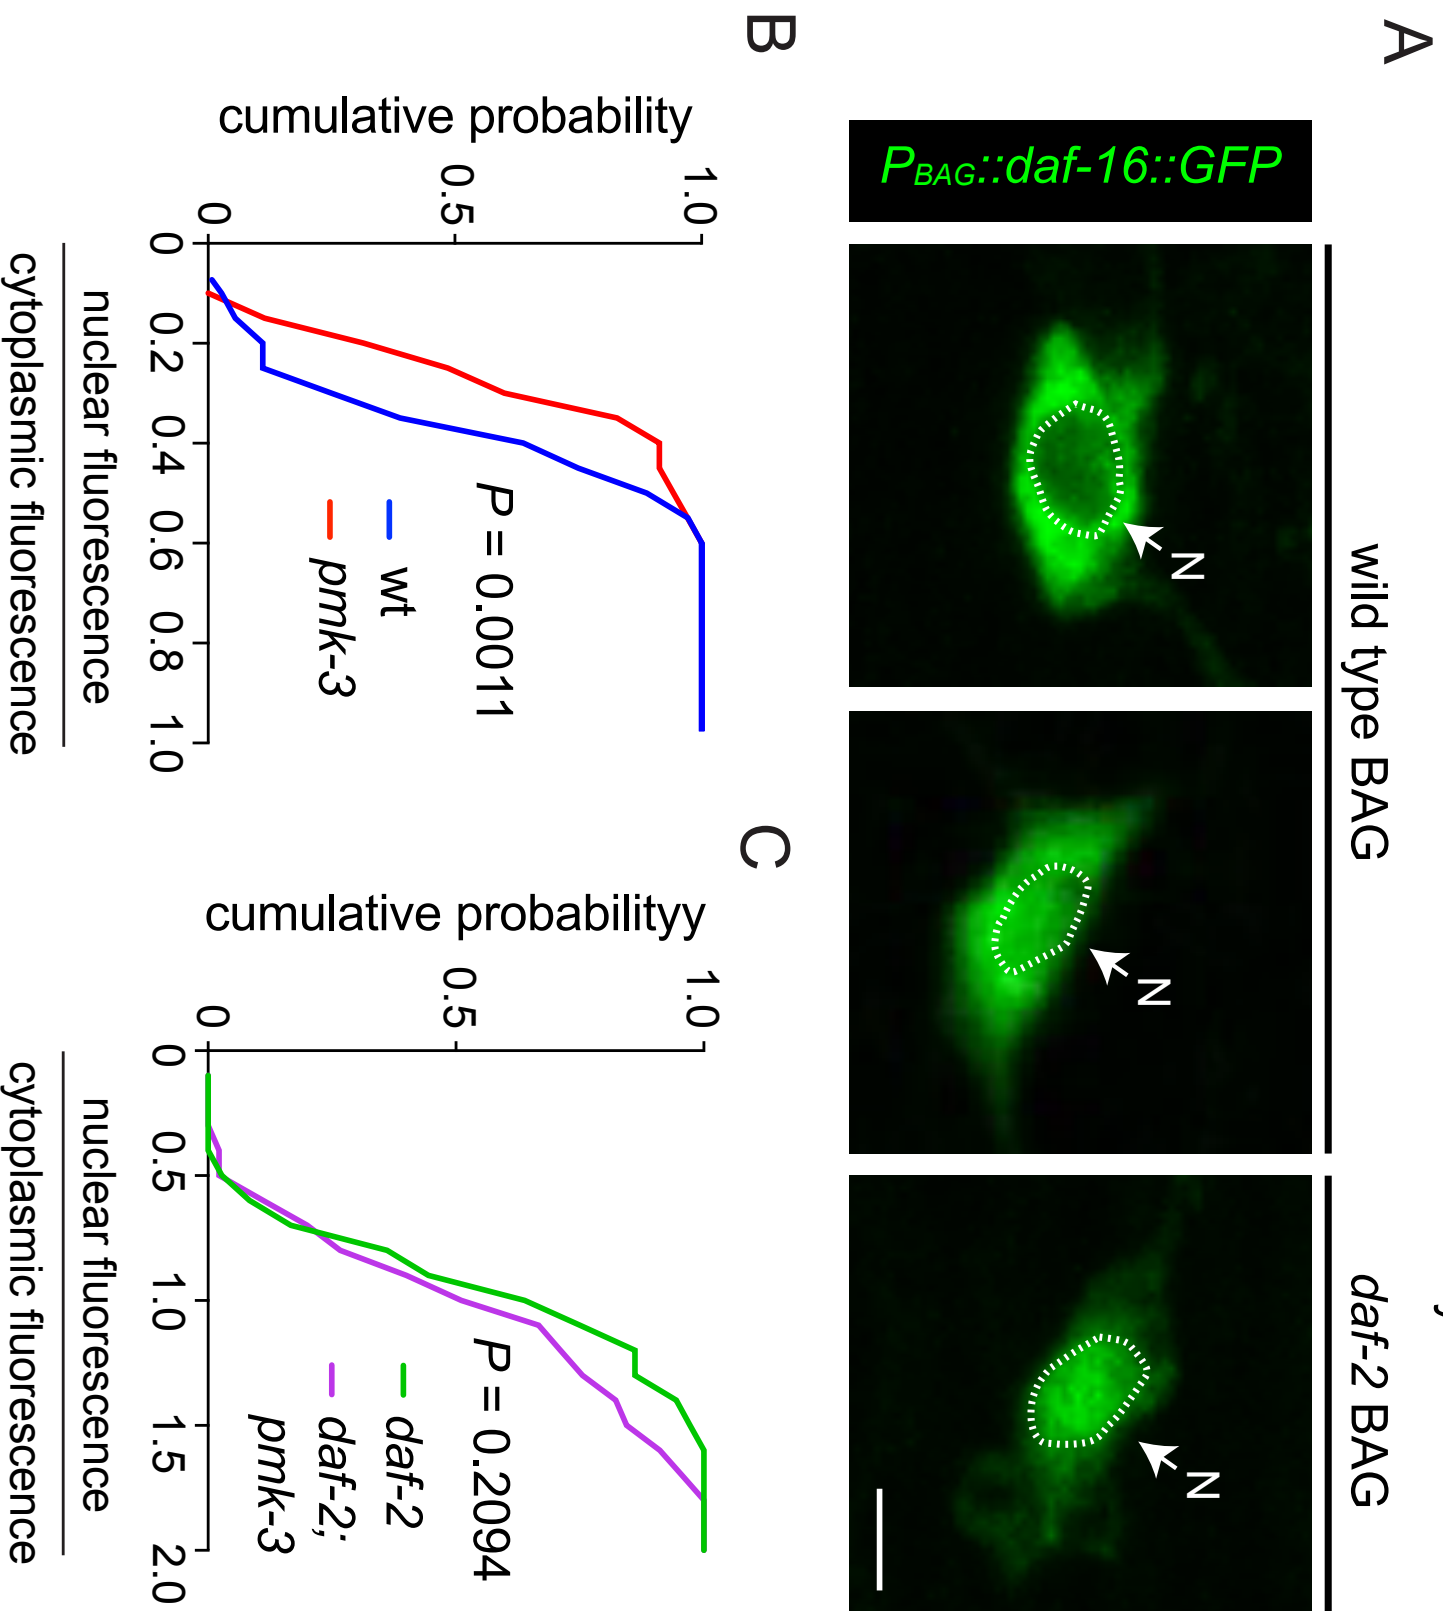



Bayer Horowitz Supplemental Figure S1

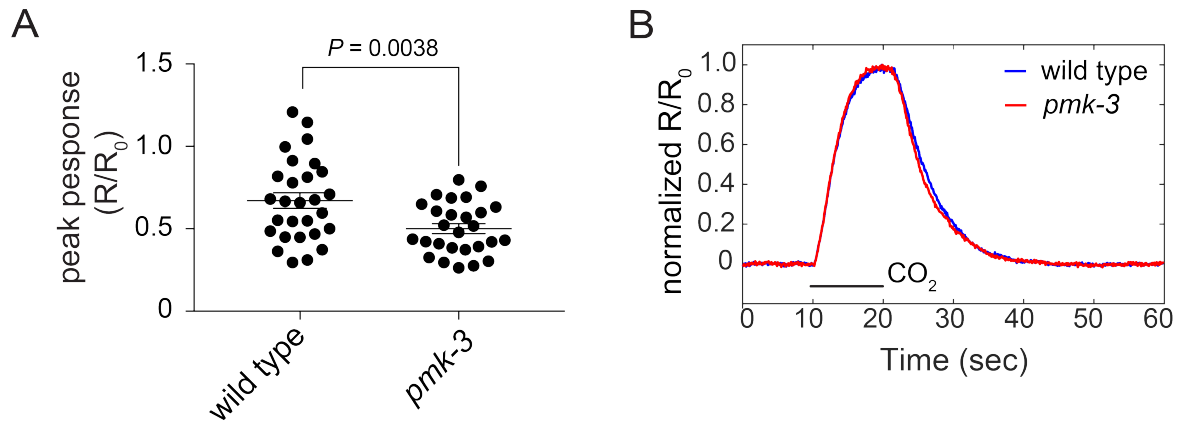

**Supplemental Figure S1: *pmk-3* mutant BAG neurons exhibit impaired chemotransduction in CO<sub>2</sub>-Sensing BAG neurons**

A. Scatter plots showing the distribution of peak calcium responses (R/R<sub>0</sub> values) of wild-type and *pmk-3(ok169)* mutant BAG neurons to 10% CO<sub>2</sub> stimuli.  $P = 0.0038$ , unpaired t-test.  $N > 26$  animals/genotype. Error bars represent SEM.

B. Dynamics of average calcium responses of wild-type and *pmk-3(ok169)* mutant BAG neurons to 10% CO<sub>2</sub> stimuli.

Bayer Horowitz Supplemental Figure S2

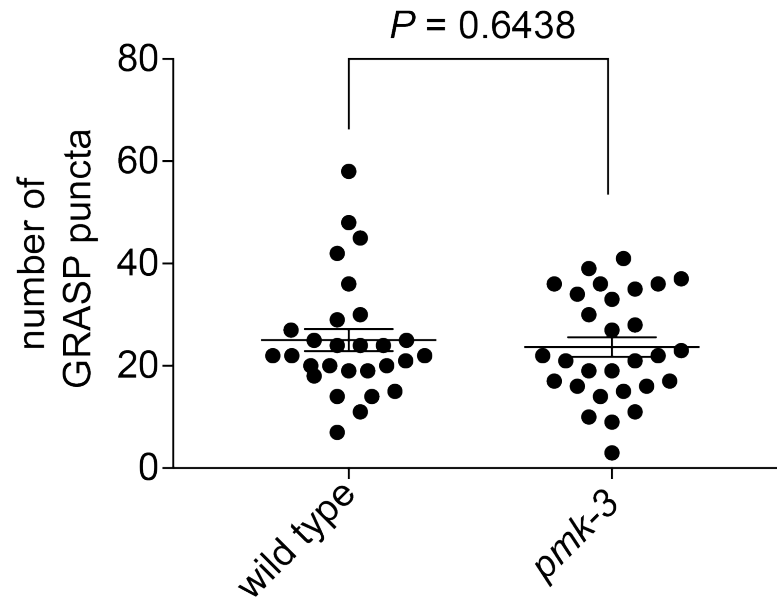

**Supplemental Figure S2: *pmk-3* mutant BAG neurons form normal number of synapses.**

Scatter plot showing the number of GRASP-puncta in wild-type and *pmk-3(ok169)* mutant BAG neurons.  $P = 0.6438$ , unpaired t-test.  $N > 28$  animals/genotype. Error bars represent SEM.

Bayer Horowitz Supplemental Figure S3

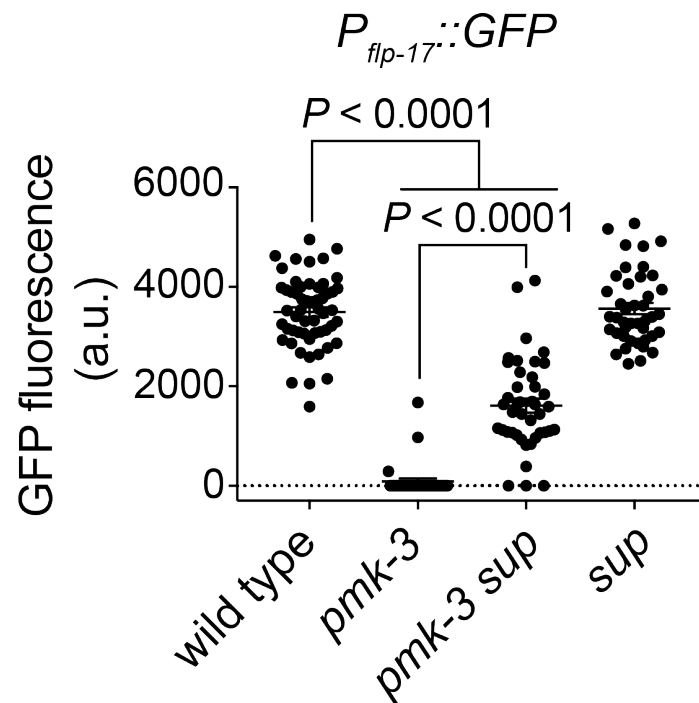

**Supplemental Figure S3: Suppressor mutations partially restore the levels of *flp-17* reporter expression to *pmk-3* mutant BAG cells.**

Levels of  $P_{flp-17::GFP}$  expression in the wild-type, *pmk-3(wz31)*, *pmk-3(wz31) sup(wz75)*, and *sup(e169)* mutant animals (\*\*\*\*)  $P < 0.0001$ , ordinary one-way ANOVA followed by Tukey's multiple comparison test.  $N > 20$  animals/genotype. (a.u.) arbitrary units. Error bars represent SEM.

Bayer Horowitz Supplemental Figure S4

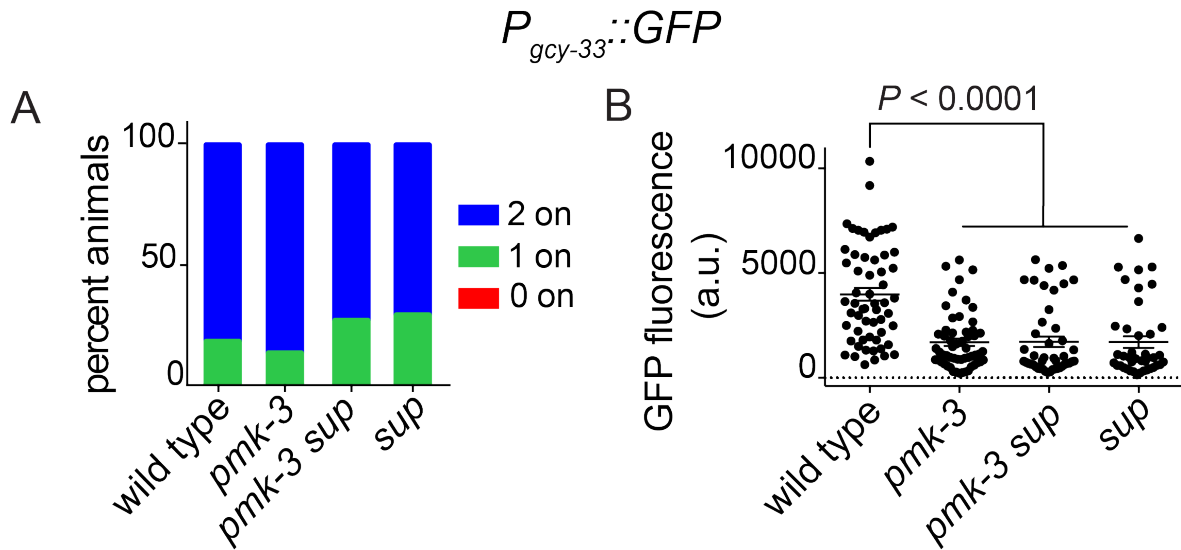

**Supplemental Figure S4: Suppressor regulates some, but not all, PMK-3 regulated genes in BAG neurons.**

(A). Frequency of  $P_{gcy-33}::GFP$  expression in the wild-type, *pmk-3(wz31)*, *pmk-3(wz31) sup(wz75)*, and *sup(e169)* mutant animals.

(B). Levels of  $P_{gcy-33}::GFP$  expression in the wild-type, *pmk-3(wz31)*, *pmk-3(wz31) sup(wz75)*, and *sup(e169)* mutant animals. (\*\*\*\*)  $P < 0.0001$ , ordinary one-way ANOVA followed by Tukey's multiple comparison test.  $N > 20$  animals/genotype. (a.u.) arbitrary units. Error bars represent SEM.

Bayer Horowitz Supplemental Figure S5

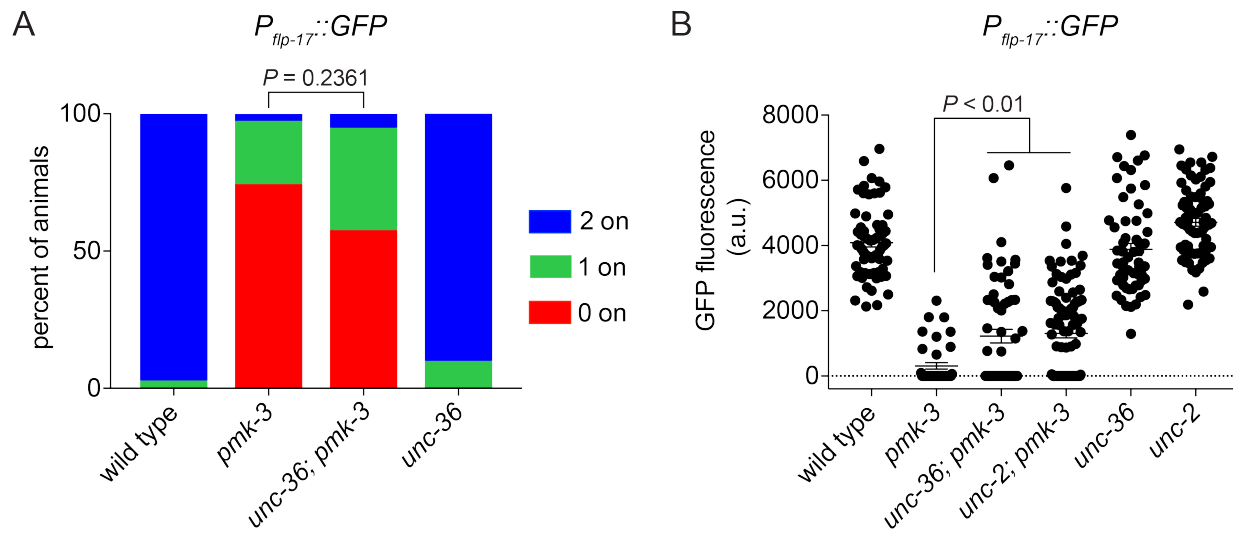

**Supplemental Figure S5: Mutations in NPQ-type Voltage Gated Calcium Channel subunits restore *flp-17* expression to *pmk-3* mutant BAG neurons**

(A). Penetrance of  $P_{flp-17::GFP}$  expression in the wild-type, *pmk-3(ok169)*, *unc-36(e251)*; *pmk-3(ok169)*, and *unc-36(e251)* mutant animals.  $P = 0.2361$ , chi-square test.  $N \geq 30$  animals/genotype.

(B). Levels of  $P_{flp-17::GFP}$  expression in the wild-type, *pmk-3(ok169)*, *unc-36(e251)*; *pmk-3(ok169)*, *pmk-3(ok169); unc-2(e55)*, *unc-36(e251)*, and *unc-2(e55)* mutant animals.  $P = 0.0028$  for *pmk-3* vs *unc-36; pmk-3* and  $P = 0.0003$  for *pmk-3* vs *pmk-3; unc-2*, ordinary one-way ANOVA followed by Tukey's multiple comparison test.  $N \geq 30$  animals/genotype. (a.u.) arbitrary units. Error bars represent SEM.

Bayer Horowitz Supplemental Figure S6

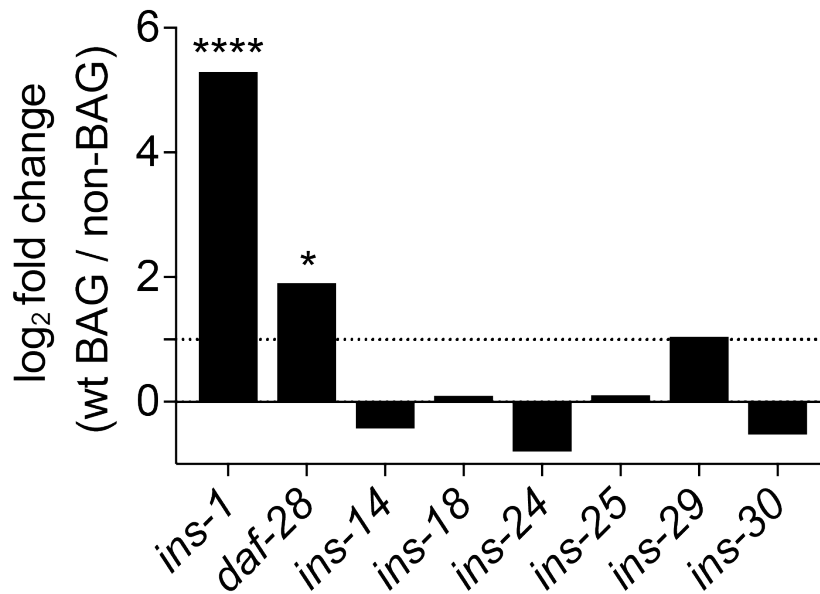

**Supplemental Figure S6: The insulin like peptides, *ins-1* and *daf-28*, are enriched in wild-type BAG cells.**

Fold changes of gene expression in wild type BAG cells versus non-BAG cells for *ins-1* and ILPs that are enriched in *pmk-3* mutant BAG cells. (\*)  $P < 0.05$ , (\*\*\*\*)  $P < 0.0001$ .



Bayer Horowitz Supplemental Figure S7

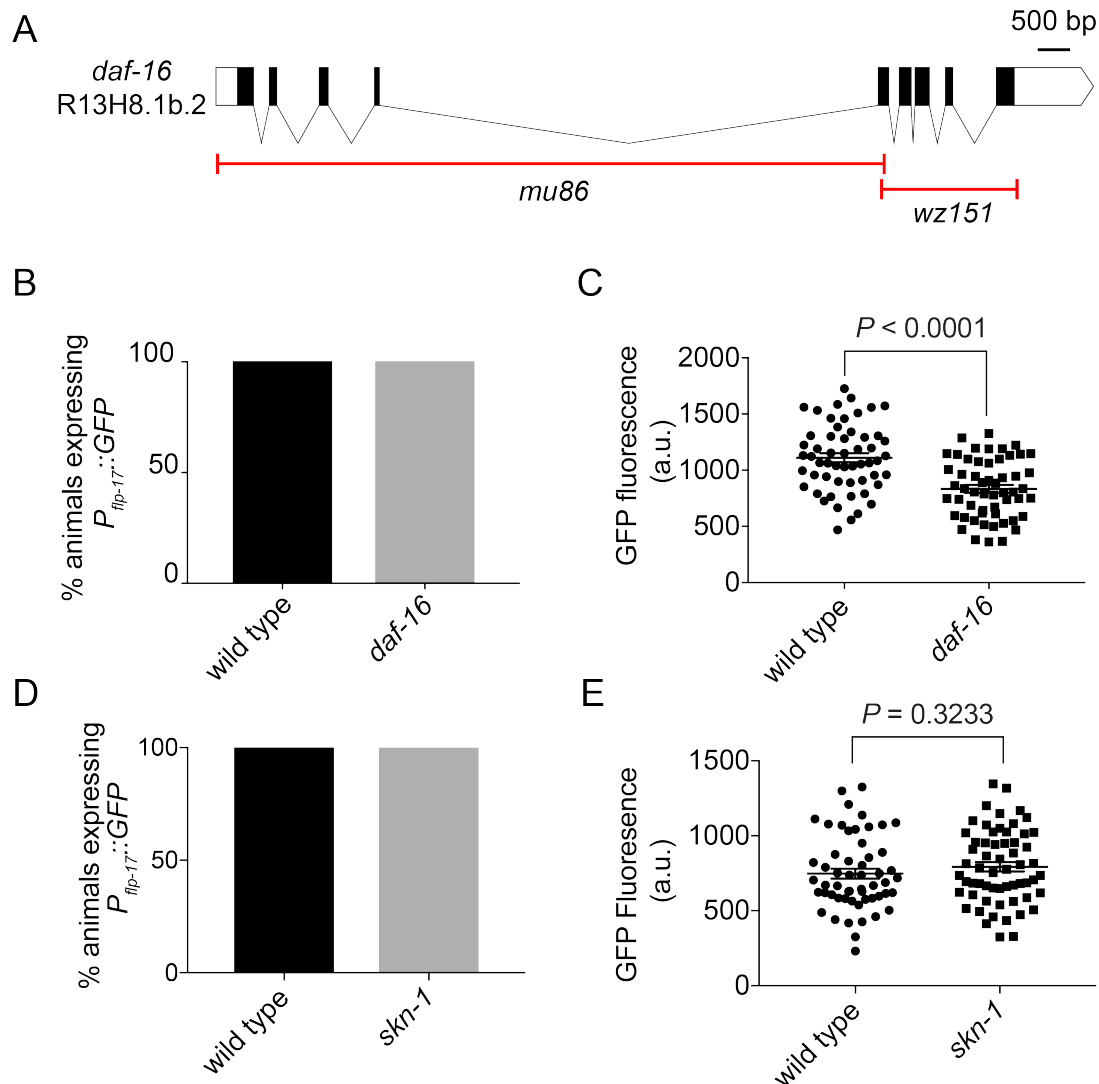

**Supplemental Figure S7: Loss of DAF-16 reduces levels of *flp-17* expression.**

(A). Structure of the *daf-16* genetic locus showing the canonical null allele, *mu86*, and the *wz151* 2065 base pair deletion allele generated using CRISPR/Cas9 mutagenesis.

(B). Percentage of wild-type and *daf-16(wz151)* mutant animals expressing  $P_{flp-17}::GFP$ .

(C). Levels of  $P_{flp-17}::GFP$  fluorescence in the wild-type and *daf-16(wz151)* mutant animals.  $P < 0.0001$ , unpaired t-test.

(D). Percentage of wild-type and *skn-1(zu67)* mutant animals expressing  $P_{flp-17}::GFP$ .

## Bayer Horowitz Supplemental Figure S7

Because *skn-1(zu67)* is maternal effect lethal, *skn-1(zu67)* homozygous mutants were picked from heterozygous mothers carrying the *mls11[myo-2::GFP]* balancer chromosome for analysis.

(E). Levels of *P<sub>flip-17</sub>::GFP* fluorescence in the wild-type and *skn-1(zu67)* mutant animals.

$P = 0.3233$ , unpaired t-test.

(a.u.) arbitrary units.  $N > 25$  animals/genotype. Error bars represent SEM.
